# Supplementary material for: Apnoeic oxygenation with nasal cannula oxygen at different flow rates in anaesthetised patients: a study protocol for a non-inferiority randomised controlled trial
Source: PubMed Central journal article supplement — BMJ Open. 2019 Jul 11;9(7):e025442. doi: 10.1136/bmjopen-2018-025442 (PMC6629420; doi:10.1136/bmjopen-2018-025442), 2019-07-11
Supplement: bmjopen-2018-025442.draft_revisions.pdf [file bmjopen-2018-025442.draft_revisions.pdf]

# BMJ Open

BMJ Open is committed to open peer review. As part of this commitment we make the peer review history of every article we publish publicly available.

When an article is published we post the peer reviewers' comments and the authors' responses online. We also post the versions of the paper that were used during peer review. These are the versions that the peer review comments apply to.

The versions of the paper that follow are the versions that were submitted during the peer review process. They are not the versions of record or the final published versions. They should not be cited or distributed as the published version of this manuscript.

BMJ Open is an open access journal and the full, final, typeset and author-corrected version of record of the manuscript is available on our site with no access controls, subscription charges or pay-per-view fees (<http://bmjopen.bmj.com>).

If you have any questions on BMJ Open's open peer review process please email [info.bmjopen@bmj.com](mailto:info.bmjopen@bmj.com)

# BMJ Open

## Apnoeic oxygenation with nasal cannula oxygen at different flow rates in anaesthetised patients – a study protocol for a randomised-controlled trial

|                               |                                                                                                                                                                                                                                                                                                                                                                                                                                    |
|-------------------------------|------------------------------------------------------------------------------------------------------------------------------------------------------------------------------------------------------------------------------------------------------------------------------------------------------------------------------------------------------------------------------------------------------------------------------------|
| Journal:                      | <i>BMJ Open</i>                                                                                                                                                                                                                                                                                                                                                                                                                    |
| Manuscript ID                 | bmjopen-2018-025442                                                                                                                                                                                                                                                                                                                                                                                                                |
| Article Type:                 | Protocol                                                                                                                                                                                                                                                                                                                                                                                                                           |
| Date Submitted by the Author: | 23-Jul-2018                                                                                                                                                                                                                                                                                                                                                                                                                        |
| Complete List of Authors:     | Theiler, Lorenz; Inselspital Bern Universitätsklinik für Anesthesiologie und Schmerztherapie<br>Schneeberg, Fabian; Inselspital Bern Universitätsklinik für Anesthesiologie und Schmerztherapie<br>Riedel, Thomas; Kantonsspital Graubunden<br>Kaiser, Heiko; Inselspital Bern Universitätsklinik für Anesthesiologie und Schmerztherapie<br>Greif, Robert ; Inselspital Universitätsspital Bern, Anaesthesiology and PAin Therapy |
| Keywords:                     | apnoeic oxygenation, general anaesthesia, hypercapnia, nasal cannula                                                                                                                                                                                                                                                                                                                                                               |
|                               |                                                                                                                                                                                                                                                                                                                                                                                                                                    |

SCHOLARONE™  
Manuscripts

1  
2  
3 1 **Apnoeic oxygenation with nasal cannula oxygen at different flow rates**  
4  
5  
6 2 **in anaesthetised patients – a study protocol for a randomised-**  
7  
8  
9 3 **controlled trial**  
10  
11  
12 4

14 5 *Lorenz Theiler*<sup>1</sup>

17 6 *Fabian Schneeberg*<sup>1</sup>

20 7 *Thomas Riedel*<sup>2</sup>

22 8 *Heiko Kaiser*<sup>1</sup>

25 9 *Robert Greif*<sup>1</sup>

27 10 1 Department of Anaesthesiology and Pain Therapy, Bern University Hospital, University  
28  
29 11 of Bern, Bern, Switzerland

32 12 2 Department of Paediatrics, Kantonsspital Graubünden, Chur, Switzerland

34  
35  
36  
37 14 Short title: Physiology Regarding Apnoeic Oxygenation (PHARAO) using nasal cannula  
38  
39 15 therapy at different flow rates  
40  
41  
42  
43

44 17 Corresponding author: Fabian Schneeberg, Department of Anaesthesiology and Pain  
45  
46 18 Therapy Inselspital Bern, Freiburgstrasse, 3010 Bern, Switzerland;

48 19 [fabian.schneeberg@gmail.com](mailto:fabian.schneeberg@gmail.com); 0041 77 424 44 12

50 20 Key Words: apnoeic oxygenation, general anaesthesia, hypercapnia, nasal cannula

52 21  
53 22 Word count: 3324

55 23 Word count abstract: 303

## 24 **ABSTRACT**

### 25 **Introduction**

26 Apnoeic oxygenation using nasal high-flow oxygen delivery systems with heated and  
27 humidified oxygen has recently gained popularity in the anaesthesia community. It has  
28 been shown to allow a prolonged apnoea time of up to 65 minutes as CO<sub>2</sub> increase was  
29 far slower compared to previously reported data from CO<sub>2</sub> increase during apnoea. A  
30 ventilatory exchange due to the high nasal oxygen flow was proposed explaining that  
31 phenomenon. However, recent studies in children did not show any difference in CO<sub>2</sub>  
32 clearance comparing high-flow to low-flow oxygen. To investigate this ventilatory  
33 exchange in adults, we plan this study comparing different oxygen flow rates and the  
34 increase of CO<sub>2</sub> during apnoea. We hypothesise that CO<sub>2</sub> clearance is non-inferior when  
35 applying low oxygen flow rates.

### 36 **Methods and analysis**

37 In this single-centre, single-blinded, randomized-controlled trial we randomly assign 100  
38 patients planned for elective surgery to either control (oxygen 70l/min, airway opened by  
39 laryngoscopy) or one of three intervention groups: oxygen 70l/min, or 10l/min, or 2l/min,  
40 all with jaw thrust to secure airway patency. After anaesthesia induction and  
41 neuromuscular blockage, either one of the interventions or the control will be applied  
42 according to randomisation. Throughout the apnoea period, we will measure the increase  
43 of transcutaneous pCO<sub>2</sub> (tcpCO<sub>2</sub>) until any one of the following criteria is met: time = 15  
44 minutes, SpO<sub>2</sub> < 92%, tcpCO<sub>2</sub> > 10.67kPa, art. pH < 7.1, K<sup>+</sup> > 6.0 mmol/l. Primary outcome is  
45 the mean tcpCO<sub>2</sub> increase in kPa/min.

1  
2  
3 46 **Ethics and dissemination**  
4

5 47 After Cantonal Ethic Committee of Bern approval (ID 2018-00293, 22.03.2018) all study  
6  
7 48 participants will provide written informed consent. Patients vulnerable towards hypoxia  
8  
9  
10 49 or hypercarbia are excluded. Study results will be published in a peer-reviewed journal  
11  
12 50 and presented at national and international conferences.  
13  
14

15 51 **Trial registration**  
16

17  
18 52 This study was registered on [www.clinicaltrials.gov](http://www.clinicaltrials.gov) (NCT03478774) and the Swiss Trial  
19  
20 53 Registry KOFAM (SNCTP000002861).  
21  
22

23 54  
24  
25  
26  
27  
28  
29  
30  
31  
32  
33  
34  
35  
36  
37  
38  
39  
40  
41  
42  
43  
44  
45  
46  
47  
48  
49  
50  
51  
52  
53  
54  
55  
56  
57  
58  
59  
60

## 55 STRENGTHS AND LIMITATIONS OF THIS STUDY

- 56       ▪ Extensive measurements and rigorous study design on comparable groups  
57           allows analysis of the physiologic response to apnoeic oxygenation and  
58           increasing CO<sub>2</sub> over time to assess a possible ventilatory effect of nasal oxygen  
59           delivery.
- 60       ▪ Randomised, direct comparison of different nasal oxygen flow rates to  
61           investigate their subsequent effect on CO<sub>2</sub> clearance over time in order to  
62           determine the existence of a ventilatory effect.
- 63       ▪ For this “proof of effect” study, we include an essentially healthy study  
64           population, which limits the transfer of results to patients with compromised  
65           lung function or other major health issues.
- 66       ▪ Due to obvious differences in devices, anaesthetists cannot be blinded but it is  
67           unlikely, that this will influence our primary outcome (CO<sub>2</sub> increase).

## 69 INTRODUCTION

70 Apnoeic oxygenation was first scientifically described by F. Volhard in 1908.<sup>1</sup> He  
71 sufficiently oxygenated paralysed dogs through a glass tube placed in the trachea  
72 without ventilation or respiratory movements. This only worked when 100% oxygen was  
73 provided, which was later confirmed by others.<sup>2-4</sup> In 2015, Patel et al. applied the same  
74 principle to high-flow nasal oxygenation (HFNO), but administered heated, humidified  
75 oxygen through nasal cannulas at very high flow rates up to 70 l/min in adults. The study  
76 group observed a lower-than-expected rise of CO<sub>2</sub> using this method. This allowed  
77 extension in apnoea time of patients who underwent general anaesthesia, even if they  
78 had difficult airways.<sup>5</sup> A new term for this oxygen delivery technique was thus created by  
79 the study authors: THRIVE – transnasal humidified rapid-insufflation ventilatory  
80 exchange. The ventilatory effect is thought to happen by turbulences caused by the high-  
81 flow oxygen combined with the open mouth. These turbulences are believed to continue  
82 down through the trachea into the alveoli, which ultimately leads to a wash out of CO<sub>2</sub>.  
83 Thereafter, several studies described prolonged apnoea time without desaturation up to  
84 65 minutes during continuous laryngoscopy or bronchoscopy<sup>5-7</sup>, or for laryngeal or  
85 tracheal surgery, where a tracheal tube would block the surgical field.<sup>8</sup>  
86 However, the physiologic effects of HFNO remain insufficiently understood. Especially  
87 the ventilatory effect has not yet been proven with sufficient data. Rising CO<sub>2</sub> levels are  
88 the time limitation for HFNO, as they result in effects such as marked acidosis, increased  
89 blood pressure, increased heart rate and increased cerebral blood flow.<sup>9-11</sup> During the last  
90 century, PaCO<sub>2</sub> increase in apnoeic patients has been repeatedly studied. According to  
91 that literature, PaCO<sub>2</sub> increases rapidly during the first minute of apnoea (1.6-1.73 kPa),  
92 while afterwards a linear increase of about 0.4-0.67 kPa/min sets in.<sup>4 11-13</sup> This physiologic

1  
2  
3 93 CO<sub>2</sub> increase is faster than the one described using HFNO, which is only about 0.15-0.24  
4  
5 94 kPa/min.

6  
7 95 Recently, two studies showed that apnoeic oxygenation using low flow rates in children  
8  
9 96 is equal to HFNO<sup>14 15</sup> without difference regarding CO<sub>2</sub> increase. Given this new evidence,  
10  
11 97 it seems possible that nasal oxygen flow rate has little to no impact on CO<sub>2</sub> clearance in  
12  
13 98 adults as well.

14  
15  
16 99 Therefore, we will compare different nasal flow rates of 100% oxygen (70 l/min, 10 l/min  
17  
18 100 and 2 l/min) with HFNO (70l/min). Furthermore, we will apply continuous laryngoscopy to  
19  
20 101 HFNO and compare it to normal jaw thrust in the intervention groups in order to  
21  
22 102 determine how mouth opening influences CO<sub>2</sub> clearance.

23  
24  
25 103 We hypothesise that any of our intervention groups (70 l/min, 10 l/min and 2 l/min, all with  
26  
27 104 jaw thrust) is non-inferior to the control group (HFNO with oxygen 70 l/min using  
28  
29 105 continuous laryngoscopy).

30  
31  
32  
33 106  
34  
35  
36  
37  
38  
39  
40  
41  
42  
43  
44  
45  
46  
47  
48  
49  
50  
51  
52  
53  
54  
55  
56  
57  
58  
59  
60



## 107 **METHODS AND ANALYSIS**

108 This study was approved by the Cantonal Ethics Committee of Bern (ID 2018-00293) and is  
109 registered on [www.clinicaltrials.gov](http://www.clinicaltrials.gov) (NCT03478774) as well as on the Swiss Trial Registry  
110 KOFAM (SNCTP000002861).

### 111 **Aims**

112 Our primary aim is to better understand possible ventilatory effects during apnoeic  
113 oxygenation using nasal cannulas at different flow rates. Our secondary aim is to  
114 demonstrate the physiologic effects of increased CO<sub>2</sub> levels on human physiology during  
115 general anaesthesia.

### 116 **Design**

117 This is a single-centre, single-blinded, prospective, randomised controlled trial at the Bern  
118 University Hospital, Bern, Switzerland. After the study participant has enrolled in the  
119 study by signing the informed consent, he or she will be randomised using a computer-  
120 generated sequence. Once general anaesthesia is induced, and mask ventilation is  
121 possible, the sealed envelope will be opened and oxygen flow will be provided according  
122 to randomisation. Therefore, the participant is blinded towards his or her group  
123 allocation, but anaesthesiologists cannot be blinded, because devices clearly differ from  
124 each other. Once randomised, the participant will stay in the allocated group for analysis,  
125 even if another intervention is applied (intention-to-treat).

### 126 **Study population**

127 Possible participants will be screened for eligibility during their preoperative interview as  
128 well as checking the surgical schedule. We will include adults (> 18 years of age), who will

1  
2  
3 129 undergo elective surgery requiring general anaesthesia, with an American Society of  
4  
5 130 Anesthesiologists (ASA) physical health status I-III, SpO<sub>2</sub> ≥ 96% breathing room air, and  
6  
7 131 who provide written informed consent in German.

8  
9  
10 132 Because we intent to study the impact of apnoeic oxygenation on accumulation of CO<sub>2</sub>,  
11  
12 133 we will exclude all patients who – through their underlying condition – could bias or  
13  
14 134 influence the normal physiologic response. Also, for patient safety reasons we will  
15  
16 135 exclude patients that might be harmed due to study related effects or measurements.  
17  
18 136 Specifically, we exclude:

- 19  
20  
21 137 • Patients with risk factors for difficult airway (indication for flexible optic  
22  
23 138 intubation, high risk of regurgitation or expected difficult mask ventilation);  
24  
25  
26 139 • Vulnerability towards hypoxaemia (known coronary heart disease, peripheral  
27  
28 140 occlusive arterial disease, known stenosis of the carotid or vertebral arteries,  
29  
30 141 anaemia or pregnancy);  
31  
32  
33 142 • Vulnerability towards hypercarbia (pulmonary arterial hypertension, increased  
34  
35 143 intracranial pressure, intracranial surgery or hyperkalaemia);  
36  
37  
38 144 • Obstructive sleep apnoea, nasal obstruction, body-mass index < 16 kg/m<sup>2</sup> or > 35  
39  
40 145 kg/m<sup>2</sup> or known, suspected cervical spine instability, neuromuscular disorder,  
41  
42 146 absent power of judgement, limited knowledge of German language, allergies  
43  
44 147 towards any of the used agents.

45  
46  
47 148 In order to further reduce potential bias, we will stratify randomisation according to  
48  
49 149 body-mass index (BMI) into three groups (16-25 kg/m<sup>2</sup>, 25-30 kg/m<sup>2</sup> and 30-35 kg/m<sup>2</sup>) and  
50  
51 150 according to smoker status into four groups (non-smokers, non-daily smokers, daily  
52  
53 151 smokers < 40 years of age, daily smokers > 40 years of age).

1  
2  
3 152 Participants will be randomized in a 1:1:1:1 ratio (25 patients per group) using a computer-  
4  
5 153 generated sequence which will be executed by a study nurse.  
6  
7

## 8 154 **Sample size**

9  
10 155 Patel et al. showed an increase of only 0.15 kPa/min with a flow rate of 70L O<sub>2</sub>/min and  
11  
12 156 maximal mouth opening<sup>5</sup>. However, end-tidal CO<sub>2</sub> was measured, not transcutaneous  
13  
14 157 tcpCO<sub>2</sub>. Gustafson et al. measured both, tcpCO<sub>2</sub> as well as arterial pCO<sub>2</sub>, and found a CO<sub>2</sub>-  
15  
16 158 increase of 0.24 kPa/min, with a standard deviation of 0.05 kPa, which was almost twice  
17  
18 159 as high as the tcpCO<sub>2</sub> value.<sup>6</sup> Using a non-inferiority design, a difference of means of 0.04  
19  
20 160 kPa/min, a standard deviation of 0.05 kPa/min, an alpha of 0.025 (one-sided) with a power  
21  
22 161 of 80%, revealed a necessary sample size of 22 patients per group. We will include 25  
23  
24 162 patients in each group (100 patients in total) to account for possible drop outs. A  
25  
26 163 difference of means of 0.04 kPa/min CO<sub>2</sub> increase would still only result in an absolute  
27  
28 164 difference of 1.2 kPa CO<sub>2</sub> after 30 minutes of apnoea time. We defined this as measurable,  
29  
30 165 but still clinically acceptable and therefore non-inferior, because the normal range of  
31  
32 166 standard arterial pCO<sub>2</sub> is 1.3 kPa (4.7-6.0 kPa).<sup>16</sup>  
33  
34  
35  
36  
37  
38

## 39 167 **Procedure**

40  
41 168 Once written informed consent is obtained and pregnancy is excluded in female patients  
42  
43 169 by a pregnancy test, we will extract demographic data from the hospital information  
44  
45 170 system. This includes data collected through routine patients' workflow: age, sex, weight,  
46  
47 171 height, BMI, airway risk factors (Mallampati score, mouth opening, thyromental distance,  
48  
49 172 reduced neck movement, retrognathia, and dental status) underlying diseases, smoking  
50  
51 173 habits, ASA physical health status and indication for surgery.  
52  
53  
54  
55  
56  
57  
58  
59  
60

1  
2  
3 174 On the day of surgery, we will place an arterial cannula into the radial artery under local  
4  
5 175 anaesthesia and draw arterial blood gases from the awake study participant breathing  
6  
7 176 room air as a baseline measurement. We will install 1) standard anaesthesia monitoring:  
8  
9 177 EKG, pulse oximetry, invasive blood pressure, end-tidal O<sub>2</sub>, end-tidal CO<sub>2</sub>, train of four  
10  
11 178 (TOF), Narcotrend<sup>®</sup> EEG (Narcotrend<sup>®</sup>, Hannover, Germany), and 2) study related  
12  
13 179 monitoring: cardiac output (LiDCO, LiDCO Ltd, London, UK), thoracic electric impedance  
14  
15 180 tomography (EIT; using PulmoVista<sup>®</sup> 500, by Dräger, Lübeck, Germany), bilateral near-  
16  
17 181 infrared spectroscopy (NIRS; using Niro-200NX, Hamamatsu, Tokyo, Japan) and  
18  
19 182 transcutaneous pCO<sub>2</sub> und pO<sub>2</sub> (tcpO<sub>2</sub>) measurement (both via TCM5, Radiometer,  
20  
21 183 Thalwil, Switzerland). After that, we will start bag-mask pre-oxygenation until end-tidal  
22  
23 184 O<sub>2</sub> has reached 90%. Patients will receive a fentanyl bolus of 2µg/kg, and induction of  
24  
25 185 anaesthesia will begin using a target-controlled infusion (TCI, Schnider model using  
26  
27 186 syramed<sup>®</sup> µSP6000, Arcomed AG, Regensdorf, Switzerland) for propofol with a target  
28  
29 187 concentration of 3.0 µg/ml and TCI for remifentanil (Minto model using syramed<sup>®</sup>  
30  
31 188 µSP6000, Arcomed AG, Regensdorf, Switzerland) with a target concentration of 2.0  
32  
33 189 ng/ml. We will administer rocuronium 0.9mg/kg to achieve neuromuscular blockage.  
34  
35 190 After induction, general anaesthesia will be confirmed by absent end-tidal CO<sub>2</sub> readings,  
36  
37 191 unconsciousness and Narcotrend<sup>®</sup>-values in the target range of 40 to 60 under bag-mask  
38  
39 192 ventilation.  
40  
41 193 Once mask ventilation with a tidal volume of 6ml/kg and a respiratory rate of 12/min is  
42  
43 194 successful, the previously sealed envelope containing the randomisation will be opened  
44  
45 195 and the intervention will be prepared according to group allocation.  
46  
47 196 For safety reasons the experiment will be discontinued if mask ventilation is impossible  
48  
49 197 even after full neuromuscular blockage and placement of an oropharyngeal tube. The  
50  
51  
52  
53  
54  
55  
56  
57  
58  
59  
60

1  
2  
3 198 anaesthetist in charge would then intubate the trachea and no study-related  
4  
5 199 measurements would take place.

6  
7 200 For all patients who show a cardiovascular reaction (increase of heart rate and blood  
8  
9 201 pressure) to the study procedure (laryngoscopy or jaw thrust), we will titrate remifentanil  
10  
11 202 to effect. Once steady state has set in, we will no longer interfere with remifentanil.

12  
13  
14 203 Whenever Narcotrend<sup>®</sup> values rise above our target range, propofol will be increased. We  
15  
16 204 will not correct dropping Narcotrend<sup>®</sup> values as this is likely to be caused by increasing  
17  
18 205 CO<sub>2</sub> and therefore an effect we want to measure.

19  
20  
21 206 When complete neuromuscular blockage has been confirmed by TOF = 0, we will stop  
22  
23 207 mask ventilation and start the apnoea time. Arterial blood gas will be drawn and analysed  
24  
25 208 at start of apnoea.

26  
27  
28 209 If assigned to the control group, the study participant will receive high-flow humidified  
29  
30 210 oxygen at 70l/min via Optiflow<sup>™</sup> (Fisher&Paykel, Auckland, NewZealand) throughout the  
31  
32 211 apnoea period while the glottis will be visualised by videolaryngoscopy (MacGrath<sup>™</sup> MAC,  
33  
34 212 Medtronic, Dublin, Ireland), thus assuring airway patency. If assigned to one of the  
35  
36 213 intervention groups, we will apply jaw thrust and one of the following flow rates: 1) high-  
37  
38 214 flow humidified oxygen at 70l/min via Optiflow<sup>™</sup>; 2) medium-flow humidified oxygen at  
39  
40 215 10l/min (Carbamed digiflow, Switzerland; Aquapak<sup>®</sup> Hudson RCI<sup>®</sup>, Teleflex<sup>®</sup>, Wayne,  
41  
42 216 Pennsylvania, USA; O2Star<sup>™</sup> nasal cannula curved, Dräger, Lübeck, Germany); or 3) low-  
43  
44 217 flow humidified oxygen at 2l/min (Carbamed digiflow, Switzerland; Aquapak<sup>®</sup> Hudson  
45  
46 218 RCI<sup>®</sup>, Teleflex<sup>®</sup>, Wayne, Pennsylvania, USA; O2Star<sup>™</sup> nasal cannula curved, Dräger,  
47  
48 219 Lübeck, Germany).

49  
50  
51 220 During jaw thrust, upper airway patency will be visually confirmed by a nasopharyngeal  
52  
53 221 fiberscope (EF-N slim, Acutronic, Hirzel, Switzerland).<sup>17</sup> Only if the airway is obstructed,

1  
2  
3 222 we will insert an oropharyngeal airway tube (Guedel airway, Intersurgical<sup>®</sup>, Workingham,  
4  
5 223 Berkshire, UK). We will not assess the degree of opening, as this would not have any  
6  
7 224 direct consequences for the study.  
8

9  
10 225 During apnoea time, we will continuously measure invasive arterial blood pressure, pulse  
11  
12 226 oximetry and EKG as part of standard monitoring. Furthermore, we will continuously  
13  
14 227 measure tcpCO<sub>2</sub>, tcpO<sub>2</sub> by applying a probe to the patient's chest, two fingers below the  
15  
16 228 clavicle; depth of anaesthesia (Narcotrend<sup>®</sup>); bilateral brain oxygenation (NIRS); cardiac  
17  
18 229 output by pulse contour analysis; and ventilation distribution changes by thoracic  
19  
20 230 electrical impedance tomography. For this, resulting potential differences are measured,  
21  
22 231 and impedance distribution sampled at 30 Hz will be calculated by an automated  
23  
24 232 linearized Newton-Raphson reconstruction algorithm<sup>18</sup>. Relative change in end-expiratory  
25  
26 233 lung impedance (EELI) and measures of ventilation inhomogeneity such as the global  
27  
28 234 inhomogeneity index (GI) will be calculated as described previously, using customised  
29  
30 235 software (Matlab R2013a, The MathWorks Inc., Nattick, MA, USA).<sup>19,20</sup>  
31  
32  
33  
34

35 236 Furthermore, we will take arterial blood samples at the onset of apnoea, one minute after  
36  
37 237 apnoea, and thereafter every two minutes to perform blood gas analysis (total of max. 10  
38  
39 238 measurements). These blood samples will be analysed for PaO<sub>2</sub>, SaO<sub>2</sub>, PaCO<sub>2</sub>, pH,  
40  
41 239 bicarbonate and potassium.  
42  
43

44 240 During the induction of anaesthesia, potential hypotension due to the anaesthetic drugs  
45  
46 241 will be counteracted with a continuous infusion of norepinephrine. Thereafter, steady  
47  
48 242 state will set in and any change in blood pressure is due to the vasoactive effect of CO<sub>2</sub>.  
49  
50 243 As we want to measure these effects we will no longer interfere with blood pressure,  
51  
52 244 except for persisting hypotension.  
53  
54  
55  
56  
57  
58  
59  
60

1  
2  
3 245 The experiment will end when any of the following criteria is met: SpO<sub>2</sub> <92%, p<sub>t</sub>cCO<sub>2</sub>  
4  
5 246 >10.67 kPa, pH <7.1, K<sup>+</sup> >6.0 mmol/l, t = 15 minutes. Thereafter the trachea will be  
6  
7 247 intubated according to the decision of the attending anaesthetists. With that the pre-  
8  
9 248 surgical part of the study will end.  
10  
11 249 Study participants will either be visited on the first postoperative day or contacted by  
12  
13 250 phone to ask about the quality of recovery.<sup>21</sup> This includes ability to breathe easily, feeling  
14  
15 251 rested, being able to enjoy food, getting support from hospital doctors and nurses as well  
16  
17 252 as any pain, nausea and vomiting, feeling worried or anxious, or feeling sad or depressed.  
18  
19 253 Furthermore, we ask specifically for pain localised in the patient's throat, mandibular  
20  
21 254 joint, or head; nasal dryness; lip injuries; dental damages; other injuries; or any other  
22  
23 255 discomfort or complication. For assessing the severity of complications, we will use a  
24  
25 256 (modified) visual analogue scale (VAS), where 0 is no pain (or discomfort), and 10 is  
26  
27 257 maximum pain (or discomfort). We will also assess all injuries obtained during airway  
28  
29 258 management and the study period. After this interview, no further data will be acquired,  
30  
31 259 and the study ends.  
32  
33  
34  
35  
36  
37

## 38 260 **Objectives**

### 39 261 **Primary objective**

40  
41 262 Our primary objective is to measure the increase of mean transcutaneous CO<sub>2</sub> over time  
42  
43 263 in kPa/min and to determine the influence of nasal oxygen flow rate (70l/min, 10l/min and  
44  
45 264 2l/min) and the presence of an open mouth (jaw thrust vs. continuous laryngoscopy).  
46  
47  
48  
49

50 265 Secondary outcomes are: lowest O<sub>2</sub> saturation; changes in end-expiratory lung  
51  
52 266 impedance, which will help quantify the degree of atelectasis after intubation; changes in  
53  
54 267 cerebral perfusion using NIRS, and influence of increasing CO<sub>2</sub> on cardiac output and  
55  
56 268 systemic blood pressure.  
57  
58  
59  
60

## 269 **Statistical plan**

270 Distribution of data will be checked for normality using qq-plots and the Shapiro-Wilks  
271 analysis using Stata (StataCorp LLC, College Station, Texas, USA). Normal distributed data  
272 will be presented as means and standard deviation, otherwise median and interquartile  
273 range will be used. Proportions will be presented as numbers and percentage. Analytical  
274 statistics uses Mann-Whitney u-test and Student's t-test, according distribution, or  
275 ANOVA and Kruskal-Wallis for multiple group comparisons. Each of the groups will a-  
276 priory be compared to the control group independently, therefore no correction for  
277 multiple comparisons will have to be used. Other multiple comparisons and any  
278 subgroup-analyses will be performed using appropriate correction factors. Proportions  
279 will be compared by Chi-square test or Fisher's exact test. As sensitivity analyses, we will  
280 do regression analyses, using mixed effects linear regressions. All statistical analyses will  
281 be performed on an intention-to-treat basis. A  $p < 0.05$  will be considered as statistically  
282 significant.

## 283 **Patient involvement**

284 No patients or patient representatives were involved in the design of this trial.

285



## 286 ETHICS AND DISSEMINATION

287 This study will be conducted in accordance with the ICH GCP Note for Guidance on Good  
288 Clinical Practise and local regulations with approval of the Cantonal Ethics Committee  
289 Bern, following the Swiss law for human research.<sup>22</sup> The ethics committee already  
290 approved our study (ID 2018-00293), including the safety end points. A drop in O<sub>2</sub>-  
291 saturation < 92% allows for timely securing the airway without risk of hypoxic damages of  
292 the study participants. Furthermore, prior publications suggest it to be very likely that all  
293 groups maintain stable O<sub>2</sub>-saturation throughout the maximum apnoea time of 15  
294 minutes.<sup>23 24</sup> Rising CO<sub>2</sub> levels could lead to acidosis; therefore, patients vulnerable to  
295 hypercarbia are excluded preliminarily (see section *study population*). As routinely stated  
296 in the protocol for the ethics committee, the study can be terminated prematurely if new  
297 evidence suggesting severe disadvantage or increased morbidity will arise during the  
298 study period.

299 All study data will be directly recorded in the CRF, which should also be considered being  
300 source data. These data will be transferred into the departmental research  
301 documentation system – LabKey (LabKey Software, Seattle, WA, USA, version 14.3). All  
302 study data will be archived for a minimum of 10 years after study termination or  
303 premature termination of the clinical trial.

304 Data will be transferred into a secure, web-based data integration platform and  
305 controlled independently by two members of the study team. Additionally, data are  
306 double-checked by comparing the screening records with the digital anaesthesia  
307 documenting system of the hospital.

308 A study nurse otherwise not involved in the study will be in charge of data monitoring  
309 and auditing after every 20 patients.

1  
2  
3 310 Important modifications to the protocol will have to reported to the ethics committee.  
4

5 311 Both, the principal investigator and sponsor investigator will have access to the final trial  
6  
7 312 data set. Other researchers may be granted access to the dataset to answer scientific  
8  
9 313 questions.  
10

11 314 Results will be presented at national and international scientific meetings and will be  
12  
13 315 published in a peer-reviewed medical journal.  
14  
15

### 16 17 316 **Informed Consent** 18

19  
20 317 In order to be eligible for the study, all patients have to sign an ethics committee  
21  
22 318 approved informed consent form. All potential risks and benefits will be thoroughly  
23  
24 319 explained by study personnel and the patient will be given enough time to consider his or  
25  
26 320 her study participation.  
27

28  
29 321  
30  
31  
32  
33  
34  
35  
36  
37  
38  
39  
40  
41  
42  
43  
44  
45  
46  
47  
48  
49  
50  
51  
52  
53  
54  
55  
56  
57  
58  
59  
60

## 322 DISCUSSION

323 Humidified high-flow nasal oxygenation is a widely used therapy in intensive care for both  
324 adults and paediatric spontaneously breathing patients. The new use in patients under  
325 general anaesthesia has revitalized the old concept of apnoeic oxygenation. Its use in  
326 anaesthesiology spreads from oxygenating an awake patient, to pre-oxygenation, as well  
327 as to apnoeic oxygenation during rapid-sequence intubation (RSI), or during micro  
328 laryngoscopy, and bronchoscopy. More and more applications for humidified HFNO or  
329 THRIVE are emerging and they show great potential.

330 However, there is only limited evidence explaining physiologic changes during HFNO,  
331 especially the proposed mechanism of CO<sub>2</sub> elimination by a ventilatory effect in  
332 anaesthetised patients. It remains unknown how different flow rates affect CO<sub>2</sub> clearance  
333 and if a minimal flow rate (of 2l/min) is able to maintain oxygenation over 15 minutes.  
334 There are a few studies suggesting lower flow rates could also be effective.<sup>23 24</sup> However,  
335 no prospective study compared high flow to low flow so far; and it has not yet been  
336 determined how flow rate influences CO<sub>2</sub> clearance. As high CO<sub>2</sub> levels have a multitude  
337 of effects, such as pulmonic arterial vasoconstriction, acidosis, and hyperkalaemia, a  
338 better understanding of CO<sub>2</sub> clearance could lead to the definition of contraindications or  
339 safety measurements for humidified HFNO/THRIVE, especially for longer apnoea periods  
340 (e.g. during micro laryngoscopy).

341 It is not known, if changes of thoracic electric impedance tomography in anaesthetised  
342 patients are similar to those in awake patients.<sup>25</sup> For example, it is already known that  
343 end-expiratory lung impedance (EELI) is increased in awake patients. This is probably due  
344 to a higher pharyngeal pressure observed in patients with HFNO who breath  
345 spontaneously. The effect has never been evaluated in anaesthetised patients.<sup>26 27</sup>

1  
2  
3 346 Also, haemodynamic changes during apnoeic oxygenation and under increasing PaCO<sub>2</sub>  
4  
5 347 have not yet been investigated rigorously. We only found studies describing increased  
6  
7 348 PaCO<sub>2</sub> and its influence on cardiac output and brain perfusion in awake patients and  
8  
9 349 healthy volunteers<sup>9 10 28</sup>. It is very likely that anaesthetised patients have a different  
10  
11  
12 350 reaction due to the vasodilatory effect of most anaesthetic drugs, which could very easily  
13  
14 351 overweigh the vasoconstrictive effects of increased CO<sub>2</sub> levels.

15  
16 352 Overall, knowledge of the underlying physiological mechanisms during HFNO in  
17  
18 353 anaesthetised patients is still very limited. This study investigates under rigorously  
19  
20 354 controlled circumstances the concept of humidified HFNO on prolonged apnoea time,  
21  
22 355 presumably without desaturation. With our findings, we hope to improve airway  
23  
24 356 management safety as this study enables the medical community to better understand  
25  
26 357 the physiology behind apnoeic oxygenation and the influence of different nasal flow  
27  
28 358 rates on CO<sub>2</sub> clearance. Our study's extensive setup also allows us to measure the effects  
29  
30 359 of increased CO<sub>2</sub> on cerebral perfusion and cardiac output.

31  
32  
33 360 If low-flow oxygen administration with standard nasal cannula is non-inferior compared  
34  
35 361 to high-flow humidified HFNO, it could have direct clinical impact. Oxygen and standard  
36  
37 362 nasal cannula are ubiquitously available and it will be hard to argue against apnoeic  
38  
39 363 oxygenation during routine intubation. Especially for rapid sequence intubation (RSI) and  
40  
41 364 other emergency airway procedures, apnoeic oxygenation may be – and perhaps should  
42  
43 365 be – performed using a standard nasal cannula at a low flow rate.<sup>29</sup> For patients at risk of  
44  
45 366 desaturation, this has the potential to reduce complication of hypoxia and therefore will  
46  
47 367 improve patient safety with little additional resources.

48  
49 368 Due to the design of this trial, we will not be able to determine the influence of  
50  
51 369 pathophysiologic alterations of patients' underlying diseases, as we exclude severely ill

1  
2  
3 370 patients from this study for safety reasons. Furthermore, although we include 100  
4  
5 371 patients in this trial, we may still end up with an uneven distribution of risk factors. To  
6  
7 372 minimize this bias, we stratify according to BMI and smoking status, as we assume these  
8  
9 373 factors to be the most influential on our primary outcome.

11 374 Provided all groups have a similar CO<sub>2</sub> clearance, the inclusion of 100 patients will provide  
12  
13  
14 375 a solid foundation to detect even smaller haemodynamic, thoracic EIT, or EEG changes.  
15  
16 376 Nevertheless, all results are to be considered for anaesthetised patients using propofol  
17  
18 377 and remifentanyl. We do not know how other anaesthetic drugs would potentially  
19  
20  
21 378 interfere with patients' physiology.

23 379 All this leads us to the conclusion that this study will be able to provide highly interesting  
24  
25  
26 380 results and urgently needed evidence on physiologic changes during HFNO and CO<sub>2</sub>  
27  
28 381 increase in adult patients during apnoeic oxygenation. We will find an answer to our  
29  
30 382 question, if the application of nasal oxygen at 70l/min, 10l/min or 2l/min using jaw thrust is  
31  
32  
33 383 non-inferior compared to nasal oxygen at 70l/min using continuous laryngoscopy in  
34  
35 384 regard to CO<sub>2</sub> clearance in anaesthetised patients.

36  
37  
38 385  
39  
40  
41  
42  
43  
44  
45  
46  
47  
48  
49  
50  
51  
52  
53  
54  
55  
56  
57  
58  
59  
60

1  
2  
3 386 **AUTHOR CONTRIBUTIONS**  
4  
5

6 387 RG and LT conceived the study. RG, LT, FS, HK, and TR wrote the study protocol. RG, LT,  
7  
8 388 FS and HK developed the practical approach to measurement and recruitment. LT  
9  
10 389 designed the statistical analysis plan for the protocol. All authors critically reviewed this  
11  
12 390 manuscript and agree to its final form.  
13  
14  
15

16 391 **FUNDING STATEMENT**  
17  
18

19 392 This research is funded by a departmental research grant assigned to LT. For this study,  
20  
21 393 Fisher & Paykel (Auckland, New Zealand) provide all necessary breathing circuits and  
22  
23 394 nasal cannulas without costs. Fisher & Paykel are neither involved in the design nor have  
24  
25 395 they any influence on the data analysis and the presentation of results or their publication  
26  
27 396 nor do the study authors have any financial or any other collaborations with Fisher &  
28  
29 397 Paykel.  
30  
31  
32  
33

34 398 **COMPETING INTERESTS**  
35  
36

37 399 None declared.  
38  
39

40 400 **FIGURE LEGENDS**  
41  
42

43 401 Figure 1: Study flow chart  
44  
45  
46  
47  
48  
49  
50  
51  
52  
53  
54  
55  
56  
57  
58  
59  
60

## 402 REFERENCES

- 403 1. Volhard F. Über künstliche Atmung durch Ventilation der Trachea und eine einfache  
404 Vorrichtung zur rhythmischen künstlichen Atmung. *Münchener Medizinische*  
405 *Wochenschrift* 1908;55(5)
- 406 2. Meltzer SJ, Auer J. Continuous Respiration without Respiratory Movements. *J Exp Med*  
407 1909;11(4):622-5.
- 408 3. Bartlett RG, Jr., Brubach HF, Specht H. Demonstration of a ventilatory mass flow during  
409 ventilation and apnea in man. *J Appl Physiol* 1959;14(1):97-101. doi:  
410 10.1152/jappl.1959.14.1.97
- 411 4. Eger EI, Severinghaus JW. The rate of rise of PaCO<sub>2</sub> in the apneic anesthetized patient.  
412 *Anesthesiology* 1961;22:419-25.
- 413 5. Patel A, Nouraei SA. Transnasal Humidified Rapid-Insufflation Ventilatory Exchange  
414 (THRIVE): a physiological method of increasing apnoea time in patients with  
415 difficult airways. *Anaesthesia* 2015;70(3):323-9. doi: 10.1111/anae.12923
- 416 6. Gustafsson IM, Lodenius A, Tunelli J, et al. Apnoeic oxygenation in adults under general  
417 anaesthesia using Transnasal Humidified Rapid-Insufflation Ventilatory Exchange  
418 (THRIVE) - a physiological study. *Br J Anaesth* 2017;118(4):610-17. doi:  
419 10.1093/bja/aex036
- 420 7. Lyons C, Callaghan M. Apnoeic oxygenation with high-flow nasal oxygen for laryngeal  
421 surgery: a case series. *Anaesthesia* 2017;72(11):1379-87. doi: 10.1111/anae.14036
- 422 8. Riva T, Seiler S, Stucki F, et al. High-flow nasal cannula therapy and apnea time in  
423 laryngeal surgery. *Paediatr Anaesth* 2016;26(12):1206-08. doi: 10.1111/pan.12992
- 424 9. Bain AR, Ainslie PN, Hoiland RL, et al. Cerebral oxidative metabolism is decreased with  
425 extreme apnoea in humans; impact of hypercapnia. *J Physiol* 2016;594(18):5317-28.  
426 doi: 10.1113/JP272404
- 427 10. Sechzer PH, Egbert LD, Linde HW, et al. Effect of carbon dioxide inhalation on arterial  
428 pressure, ECG and plasma catecholamines and 17-OH corticosteroids in normal  
429 man. *J Appl Physiol* 1960;15:454-8. doi: 10.1152/jappl.1960.15.3.454
- 430 11. Frumin MJ, Epstein RM, Cohen G. Apneic oxygenation in man. *Anesthesiology*  
431 1959;20:789-98.
- 432 12. Holmdahl MH. Pulmonary uptake of oxygen, acid-base metabolism, and circulation  
433 during prolonged apnoea. *Acta Chir Scand Suppl* 1956;212:1-128.
- 434 13. Stock MC, Schisler JQ, McSweeney TD. The PaCO<sub>2</sub> rate of rise in anesthetized patients  
435 with airway obstruction. *J Clin Anesth* 1989;1(5):328-32.
- 436 14. Riva T, Pedersen TH, Seiler S, et al. Transnasal humidified rapid insufflation ventilatory  
437 exchange for oxygenation of children during apnoea: a prospective randomised  
438 controlled trial. *Br J Anaesth* 2018;120(3):592-99. doi: 10.1016/j.bja.2017.12.017
- 439 15. Humphreys S, Lee-Archer P, Reyne G, et al. Transnasal humidified rapid-insufflation  
440 ventilatory exchange (THRIVE) in children: a randomized controlled trial. *Br J*  
441 *Anaesth* 2017;118(2):232-38. doi: 10.1093/bja/aew401
- 442 16. M. Habben FA. Blutgasanalyse [Web Page]. 2018 [Available from:  
443 <http://flexikon.doccheck.com/de/Blutgasanalyse> accessed 19.1. 2018.
- 444 17. Uzun L, Ugur MB, Altunkaya H, et al. Effectiveness of the jaw-thrust maneuver in  
445 opening the airway: a flexible fiberoptic endoscopic study. *ORL J Otorhinolaryngol*  
446 *Relat Spec* 2005;67(1):39-44. doi: 10.1159/000084304

- 1  
2  
3 447 18. Yorkey TJ, Webster JG, Tompkins WJ. Comparing reconstruction algorithms for  
4 448 electrical impedance tomography. *IEEE transactions on bio-medical engineering*  
5 449 1987;34(11):843-52.  
6 450 19. Schnidrig S, Casaulta C, Schibler A, et al. Influence of end-expiratory level and tidal  
7 451 volume on gravitational ventilation distribution during tidal breathing in healthy  
8 452 adults. *European journal of applied physiology* 2013;113(3):591-8.  
9 453 20. Wettstein M, Radlinger L, Riedel T. Effect of different breathing aids on ventilation  
10 454 distribution in adults with cystic fibrosis. *PloS one* 2014;9(9):e106591.  
11 455 21. Myles PS, Boney O, Botti M, et al. Systematic review and consensus definitions for the  
12 456 Standardised Endpoints in Perioperative Medicine (StEP) initiative: patient  
13 457 comfort. *British Journal of Anaesthesia* 2018;120(4):705-11. doi:  
14 458 10.1016/j.bja.2017.12.037  
15 459 22. Bundesverfassung der Schweizerischen Eidgenossenschaft, Artikel 118b, 2010.  
16 460 23. Teller LE, Alexander CM, Frumin MJ, et al. Pharyngeal insufflation of oxygen prevents  
17 461 arterial desaturation during apnea. *Anesthesiology* 1988;69(6):980-2.  
18 462 24. Heard A, Toner AJ, Evans JR, et al. Apneic Oxygenation During Prolonged  
19 463 Laryngoscopy in Obese Patients: A Randomized, Controlled Trial of Buccal RAE  
20 464 Tube Oxygen Administration. *Anesth Analg* 2017;124(4):1162-67. doi:  
21 465 10.1213/ANE.0000000000001564  
22 466 25. Parke RL, Bloch A, McGuinness SP. Effect of Very-High-Flow Nasal Therapy on Airway  
23 467 Pressure and End-Expiratory Lung Impedance in Healthy Volunteers. *Respiratory*  
24 468 *Care* 2015;60(10):1397-403. doi: 10.4187/respcare.04028  
25 469 26. Groves N, Tobin A. High flow nasal oxygen generates positive airway pressure in adult  
26 470 volunteers. *Aust Crit Care* 2007;20(4):126-31. doi: 10.1016/j.aucc.2007.08.001  
27 471 27. Parke R, McGuinness S, Eccleston M. Nasal high-flow therapy delivers low level  
28 472 positive airway pressure. *Br J Anaesth* 2009;103(6):886-90. doi: 10.1093/bja/aep280  
29 473 28. Price HL. Effects of carbon dioxide on the cardiovascular system. *Anesthesiology*  
30 474 1960;21:652-63.  
31 475 29. Weingart SD, Levitan RM. Preoxygenation and prevention of desaturation during  
32 476 emergency airway management. *Ann Emerg Med* 2012;59(3):165-75 e1. doi:  
33 477 10.1016/j.annemergmed.2011.10.002  
34 478  
35  
36  
37  
38  
39  
40  
41  
42  
43  
44  
45  
46  
47  
48  
49  
50  
51  
52  
53  
54  
55  
56  
57  
58  
59  
60



1  
2  
3  
4  
5  
6  
7  
8  
9  
10  
11  
12  
13  
14  
15  
16  
17  
18  
19  
20  
21  
22  
23  
24  
25  
26  
27  
28  
29  
30  
31  
32  
33  
34  
35  
36  
37  
38  
39  
40  
41  
42  
43  
44  
45  
46  
47  
48  
49  
50  
51  
52  
53  
54  
55  
56  
57  
58  
59  
60

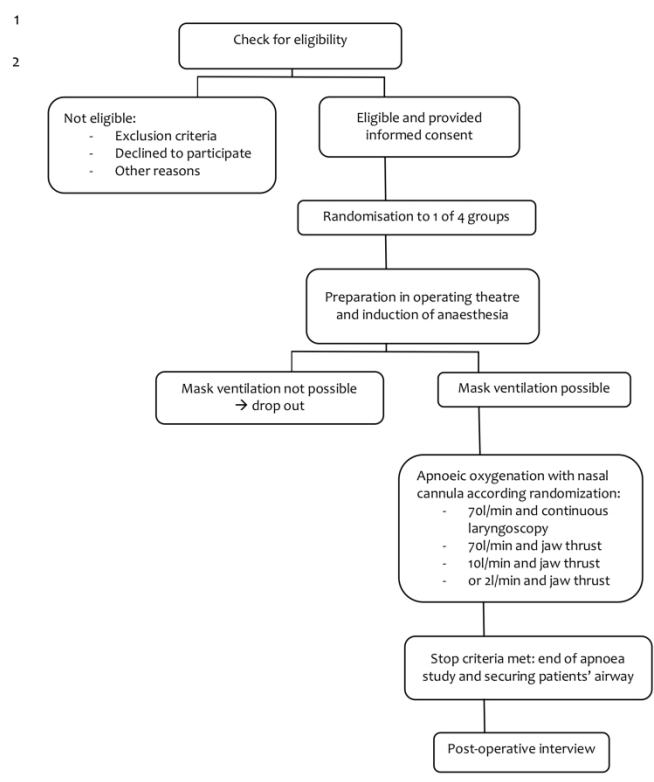

1

Figure 1

296x419mm (300 x 300 DPI)

# BMJ Open

## Apnoeic oxygenation with nasal cannula oxygen at different flow rates in anaesthetised patients – a study protocol for a non-inferiority randomised-controlled trial

|                                 |                                                                                                                                                                                                                                                                                                                                                                                                                                                                                                                                 |
|---------------------------------|---------------------------------------------------------------------------------------------------------------------------------------------------------------------------------------------------------------------------------------------------------------------------------------------------------------------------------------------------------------------------------------------------------------------------------------------------------------------------------------------------------------------------------|
| Journal:                        | <i>BMJ Open</i>                                                                                                                                                                                                                                                                                                                                                                                                                                                                                                                 |
| Manuscript ID                   | bmjopen-2018-025442.R1                                                                                                                                                                                                                                                                                                                                                                                                                                                                                                          |
| Article Type:                   | Protocol                                                                                                                                                                                                                                                                                                                                                                                                                                                                                                                        |
| Date Submitted by the Author:   | 05-Mar-2019                                                                                                                                                                                                                                                                                                                                                                                                                                                                                                                     |
| Complete List of Authors:       | Theiler, Lorenz; Inselspital Bern Universitätsklinik für Anesthesiologie und Schmerztherapie<br>Schneeberg, Fabian; Inselspital Bern Universitätsklinik für Anesthesiologie und Schmerztherapie<br>Riedel, Thomas; Kantonsspital Graubünden<br>Kaiser, Heiko; Inselspital Bern Universitätsklinik für Anesthesiologie und Schmerztherapie<br>Riva, Thomas; Inselspital Bern Universitätsklinik für Anesthesiologie und Schmerztherapie<br>Greif, Robert ; Inselspital Universitätsspital Bern, Anaesthesiology and PAin Therapy |
| <b>Primary Subject Heading</b>: | Anaesthesia                                                                                                                                                                                                                                                                                                                                                                                                                                                                                                                     |
| Secondary Subject Heading:      | Anaesthesia                                                                                                                                                                                                                                                                                                                                                                                                                                                                                                                     |
| Keywords:                       | apnoeic oxygenation, general anaesthesia, hypercapnia, nasal cannula                                                                                                                                                                                                                                                                                                                                                                                                                                                            |
|                                 |                                                                                                                                                                                                                                                                                                                                                                                                                                                                                                                                 |

SCHOLARONE™  
Manuscripts

1  
2  
3  
4 1 **Apnoeic oxygenation with nasal cannula oxygen at different flow rates**  
5  
6  
7 2 **in anaesthetised patients – a study protocol for a non-inferiority**  
8  
9  
10 3 **randomised-controlled trial**  
11  
12  
13 4

15 5 *Lorenz Theiler*<sup>1</sup>

18 6 *Fabian Schneeberg*<sup>1</sup>

21 7 *Thomas Riedel*<sup>2</sup>

24 8 *Heiko Kaiser*<sup>1</sup>

27 9 *Thomas Riva*<sup>1</sup>

29 10 *Robert Greif*<sup>1</sup>

31  
32 11 1 Department of Anaesthesiology and Pain Therapy, Bern University Hospital, University  
33  
34 12 of Bern, Bern, Switzerland

36 13 2 Department of Paediatrics, Kantonsspital Graubünden, Chur, Switzerland

39  
40  
41 15 Short title: Physiology Regarding Apnoeic Oxygenation (PHARAO) using nasal cannula  
42  
43  
44 16 therapy at different flow rates  
45

46  
47 17  
48  
49 18 Corresponding author: Fabian Schneeberg, Department of Anaesthesiology and Pain  
50  
51 19 Therapy Inselspital Bern, Freiburgstrasse, 3010 Bern, Switzerland;  
52  
53 20 [fabian.schneeberg@gmail.com](mailto:fabian.schneeberg@gmail.com); 0041 77 424 44 12

56 21 Key Words: apnoeic oxygenation, general anaesthesia, hypercapnia, nasal cannula

58 22  
59 23 Word count: 4346  
60

1  
2  
3  
4  
5  
6  
7  
8  
9  
10  
11  
12  
13  
14  
15  
16  
17  
18  
19  
20  
21  
22  
23  
24  
25  
26  
27  
28  
29  
30  
31  
32  
33  
34  
35  
36  
37  
38  
39  
40  
41  
42  
43  
44  
45  
46  
47  
48  
49  
50  
51  
52  
53  
54  
55  
56  
57  
58  
59  
60

24 Word count abstract: 300

For peer review only

## 25 **ABSTRACT**

### 26 **Introduction**

27 Apnoeic oxygenation using nasal high-flow oxygen delivery systems with heated and  
28 humidified oxygen has recently gained popularity in the anaesthesia community. It has  
29 been shown to allow a prolonged apnoea time of up to 65 minutes as CO<sub>2</sub> increase was far  
30 slower compared to previously reported data from CO<sub>2</sub> increase during apnoea. A  
31 ventilatory exchange due to the high nasal oxygen flow was proposed explaining that  
32 phenomenon. However, recent studies in children did not show any difference in CO<sub>2</sub>  
33 clearance comparing high-flow to low-flow oxygen. To investigate this ventilatory  
34 exchange in adults, we plan this study comparing different oxygen flow rates and the  
35 increase of CO<sub>2</sub> during apnoea. We hypothesise that CO<sub>2</sub> clearance is non-inferior when  
36 applying low oxygen flow rates.

### 37 **Methods and analysis**

38 In this single-centre, single-blinded, randomized-controlled trial we randomly assign 100  
39 patients planned for elective surgery to either control (oxygen 70l/min, airway opened by  
40 laryngoscopy) or one of three intervention groups: oxygen 70l/min, or 10l/min, or 2l/min, all  
41 with jaw thrust to secure airway patency. After anaesthesia induction and neuromuscular  
42 blockage, either one of the interventions or the control will be applied according to  
43 randomisation. Throughout the apnoea period, we will measure the increase of  
44 transcutaneous pCO<sub>2</sub> (tcpCO<sub>2</sub>) until any one of the following criteria is met: time = 15  
45 minutes, SpO<sub>2</sub> < 92%, tcpCO<sub>2</sub> > 10.67kPa, art. pH < 7.1, K<sup>+</sup> > 6.0 mmol/l. Primary outcome is  
46 the mean tcpCO<sub>2</sub> increase in kPa/min.

## 47 **Ethics and dissemination**

48 After Cantonal Ethic Committee of Bern approval (ID 2018-00293, 22.03.2018) all study  
49 participants will provide written informed consent. Patients vulnerable towards hypoxia or  
50 hypercarbia are excluded. Study results will be published in a peer-reviewed journal and  
51 presented at national and international conferences.

## 52 **Trial registration**

53 This study was registered on [www.clinicaltrials.gov](http://www.clinicaltrials.gov) (NCT03478774) and the Swiss Trial  
54 Registry KOFAM (SNCTP000002861).

55

## 56 STRENGTHS AND LIMITATIONS OF THIS STUDY

- 57       ▪ Extensive measurements and rigorous study design on comparable groups  
58 allows analysis of the physiologic response to apnoeic oxygenation and  
59 increasing CO<sub>2</sub> over time to assess a possible ventilatory effect of nasal oxygen  
60 delivery.
- 61       ▪ Randomised, direct comparison of different nasal oxygen flow rates to  
62 investigate their subsequent effect on CO<sub>2</sub> clearance over time in order to  
63 determine the existence of a ventilatory effect.
- 64       ▪ For this “proof of effect” study, we include an essentially healthy study  
65 population, which limits the transfer of results to patients with compromised  
66 lung function or other major health issues.
- 67       ▪ Due to obvious differences in devices, anaesthetists cannot be blinded but it is  
68 unlikely, that this will influence our primary outcome (CO<sub>2</sub> increase).

## 70 INTRODUCTION

71 Apnoeic oxygenation was first scientifically described by F. Volhard in 1908.<sup>1</sup> He sufficiently  
72 oxygenated paralysed dogs through a glass tube placed in the trachea without ventilation  
73 or respiratory movements. This only worked when 100% oxygen was provided, which was  
74 later confirmed by others.<sup>2-4</sup> In 2015, Patel et al. applied the same principle to high-flow  
75 nasal oxygenation (HFNO), but administered heated, humidified oxygen through nasal  
76 cannulas at very high flow rates up to 70 l/min in adults. The study group observed a lower-  
77 than-expected rise of CO<sub>2</sub> using this method. This allowed extension in apnoea time of  
78 patients who underwent general anaesthesia, even if they had difficult airways.<sup>5</sup> A new  
79 term for this oxygen delivery technique was thus created by the study authors: THRIVE –  
80 transnasal humidified rapid-insufflation ventilatory exchange. The ventilatory effect is  
81 thought to happen by turbulences caused by the high-flow oxygen combined with the  
82 open mouth. These turbulences are believed to continue down through the trachea into  
83 the alveoli, which ultimately leads to a wash out of CO<sub>2</sub>. Thereafter, several studies  
84 described prolonged apnoea time without desaturation up to 65 minutes during  
85 continuous laryngoscopy or bronchoscopy<sup>5-7</sup>, or for laryngeal or tracheal surgery, where a  
86 tracheal tube would block the surgical field.<sup>8</sup>

87 However, the physiologic effects of HFNO remain insufficiently understood. Especially the  
88 ventilatory effect has not yet been proven with sufficient data. Rising CO<sub>2</sub> levels are the  
89 time limitation for HFNO, as they result in effects such as marked acidosis, increased blood  
90 pressure, increased heart rate and increased cerebral blood flow.<sup>9-11</sup> During the last  
91 century, PaCO<sub>2</sub> increase in apnoeic patients has been repeatedly studied. According to that  
92 literature, PaCO<sub>2</sub> increases rapidly during the first minute of apnoea (1.6-1.73 kPa), while



1  
2  
3 93 afterwards a linear increase of about 0.4-0.67 kPa/min sets in.<sup>4 11-13</sup> This physiologic CO<sub>2</sub>  
4  
5  
6 94 increase is faster than the one described using HFNO, which is only about 0.15-0.24 kPa/min.  
7  
8 95 Recently, two studies showed that apnoeic oxygenation using low flow rates in children is  
9  
10 96 equal to HFNO<sup>14 15</sup> without difference regarding CO<sub>2</sub> increase. Given this new evidence, it  
11  
12  
13 97 seems possible that nasal oxygen flow rate has little to no impact on CO<sub>2</sub> clearance in adults  
14  
15 98 as well.

16  
17  
18 99 Therefore, we will compare different nasal flow rates of 100% oxygen (70 l/min, 10 l/min and  
19  
20 100 2 l/min) with HFNO (70l/min). Furthermore, we will apply continuous laryngoscopy to HFNO  
21  
22  
23 101 and compare it to normal jaw thrust in the intervention groups in order to determine how  
24  
25 102 mouth opening influences CO<sub>2</sub> clearance.

26  
27 103 We hypothesise that any of our intervention groups (70 l/min, 10 l/min and 2 l/min, all with  
28  
29  
30 104 jaw thrust) is non-inferior to the control group (HFNO with oxygen 70 l/min using  
31  
32 105 continuous laryngoscopy) regarding mean transcutaneous CO<sub>2</sub> increase in kPa/min.  
33  
34

35 106  
36  
37  
38  
39  
40  
41  
42  
43  
44  
45  
46  
47  
48  
49  
50  
51  
52  
53  
54  
55  
56  
57  
58  
59  
60

## 107 **METHODS AND ANALYSIS**

108 This study was approved by the Cantonal Ethics Committee of Bern (ID 2018-00293) and is  
109 registered on [www.clinicaltrials.gov](http://www.clinicaltrials.gov) (NCT03478774) as well as on the Swiss Trial Registry  
110 KOFAM (SNCTP000002861).

### 111 **Aims**

112 We want to better understand possible ventilatory effects during apnoeic oxygenation  
113 using nasal cannulas at different flow rates and demonstrate the physiologic effects of  
114 increased CO<sub>2</sub> levels on human physiology during general anaesthesia.

### 115 **Design**

116 This is a single-centre, single-blinded, prospective, non-inferiority randomised controlled  
117 trial at the Bern University Hospital, Bern, Switzerland. After the study participant has  
118 enrolled in the study by signing the informed consent, he or she will be randomised using  
119 a computer-generated sequence. Once general anaesthesia is induced, and mask  
120 ventilation is possible, the sealed envelope will be opened and oxygen flow will be  
121 provided according to randomisation. Therefore, the participant is blinded towards his or  
122 her group allocation, but anaesthesiologists cannot be blinded, because devices clearly  
123 differ from each other. Once randomised, the participant will stay in the allocated group  
124 for analysis, even if another intervention is applied (intention-to-treat).

### 125 **Study population**

126 Possible participants will be screened for eligibility checking the surgical schedule and we  
127 invite them to participate during our pre-anaesthesia interview. To allow patients sufficient  
128 time to consider participation, we contact eligible study participants the day before

1  
2  
3 129 surgery. We will include adults (> 18 years of age), who will undergo elective surgery  
4  
5 130 requiring general anaesthesia, with an American Society of Anesthesiologists (ASA)  
6  
7  
8 131 physical health status I-III, SpO<sub>2</sub> ≥ 96% breathing room air, and who provide written  
9  
10 132 informed consent in German as this is the common language spoken in Bern, Switzerland.  
11  
12  
13 133 Because we intent to study the impact of apnoeic oxygenation on accumulation of CO<sub>2</sub>,  
14  
15 134 we will exclude all patients who – through their underlying condition – could bias or  
16  
17  
18 135 influence the normal physiologic response. Also, for patient safety reasons we will exclude  
19  
20 136 patients that might be harmed due to study related effects or measurements. Specifically,  
21  
22  
23 137 we exclude:

- 24  
25 138 • Patients with risk factors for difficult airway (indication for flexible optic intubation,  
26  
27  
28 139 high risk of regurgitation or expected difficult mask ventilation);
- 29  
30 140 • Vulnerability towards hypoxaemia (known coronary heart disease, peripheral  
31  
32  
33 141 occlusive arterial disease, known stenosis of the carotid or vertebral arteries,  
34  
35 142 anaemia or pregnancy);
- 36  
37  
38 143 • Vulnerability towards hypercarbia (pulmonary arterial hypertension, increased  
39  
40  
41 144 intracranial pressure, intracranial surgery or hyperkalaemia);
- 42  
43  
44 145 • Obstructive sleep apnoea, nasal obstruction, body-mass index < 16 kg/m<sup>2</sup> or > 35  
45  
46 146 kg/m<sup>2</sup> or known, suspected cervical spine instability, neuromuscular disorder,  
47  
48  
49 147 absent power of judgement, limited knowledge of German language, allergies  
50  
51 148 towards any of the used agents.

52  
53 149 In order to further reduce potential bias, we will stratify randomisation according to body-  
54  
55  
56 150 mass index (BMI) into three groups (16-25 kg/m<sup>2</sup>, 25-30 kg/m<sup>2</sup> and 30-35 kg/m<sup>2</sup>) and  
57  
58  
59 151 according to smoker status into four groups (non-smokers, non-daily smokers, daily  
60

1  
2  
3 152 smokers < 40 years of age, daily smokers > 40 years of age). According to the BMI, smoking  
4  
5  
6 153 status and age group, the patient fits into one of the possible twelve strata. Within each  
7  
8 154 strata, the groups are being randomised for the different flow rates. Participants will be  
9  
10  
11 155 randomized in a 1:1:1:1 ratio (25 patients per group) using a computer-generated sequence  
12  
13 156 which will be executed by a study nurse.

## 16 157 **Sample size**

17  
18  
19 158 Patel et al. showed an increase of only 0.15 kPa/min with a flow rate of 70L O<sub>2</sub>/min and  
20  
21 159 maximal mouth opening<sup>5</sup>. However, end-tidal CO<sub>2</sub> was measured, not transcutaneous  
22  
23 160 tcpCO<sub>2</sub>. Gustafson et al. measured both, tcpCO<sub>2</sub> as well as arterial pCO<sub>2</sub>, and found a CO<sub>2</sub>-  
24  
25 161 increase of 0.24 kPa/min, with a standard deviation of 0.05 kPa, which was almost twice as  
26  
27 162 high as the tcpCO<sub>2</sub> value.<sup>6</sup> Using a non-inferiority design, a difference of means of 0.04  
28  
29 163 kPa/min, a standard deviation of 0.05 kPa/min, an alpha of 0.025 (one-sided) with a power  
30  
31 164 of 80%, revealed a necessary sample size of 22 patients per group. We will include 25  
32  
33 165 patients in each group (100 patients in total) to account for possible drop outs. A difference  
34  
35 166 of means of 0.04 kPa/min CO<sub>2</sub> increase would still only result in an absolute difference of  
36  
37 167 1.2 kPa CO<sub>2</sub> after 30 minutes of apnoea time. We defined this as measurable, but still  
38  
39 168 clinically acceptable and therefore non-inferior, because the normal range of standard  
40  
41 169 arterial pCO<sub>2</sub> is 1.3 kPa (4.7-6.0 kPa).<sup>16</sup>

## 42 170 **Procedure**

43  
44  
45 171 Once written informed consent is obtained and pregnancy is excluded in female patients  
46  
47 172 by a pregnancy test, we will extract demographic data from the hospital information  
48  
49 173 system. This includes data collected through routine patients' workflow: age, sex, weight,  
50  
51 174 height, BMI, airway risk factors (Mallampati score, mouth opening, thyromental distance,  
52  
53  
54  
55  
56  
57  
58  
59  
60

1  
2  
3 175 reduced neck movement, retrognathia, and dental status) underlying diseases, smoking  
4  
5  
6 176 habits, ASA physical health status and indication for surgery.  
7  
8 177 On the day of surgery, we will place an arterial cannula into the radial artery under local  
9  
10 178 anaesthesia and draw arterial blood gases from the awake study participant breathing  
11  
12  
13 179 room air as a baseline measurement. We will install 1) standard anaesthesia monitoring:  
14  
15 180 EKG, pulse oximetry, invasive blood pressure, end-tidal O<sub>2</sub>, end-tidal CO<sub>2</sub>, train of four  
16  
17  
18 181 (TOF), Narcotrend® EEG (Narcotrend®, Hannover, Germany), and 2) study related  
19  
20 182 monitoring: cardiac output (LiDCO, LiDCO Ltd, London, UK), thoracic electric impedance  
21  
22  
23 183 tomography (EIT; using PulmoVista® 500, by Dräger, Lübeck, Germany), bilateral near-  
24  
25 184 infrared spectroscopy (NIRS; using Niro-200NX, Hamamatsu, Tokyo, Japan) and  
26  
27  
28 185 transcutaneous pCO<sub>2</sub> und pO<sub>2</sub> (tcpO<sub>2</sub>) measurement (both via TCM5, Radiometer, Thalwil,  
29  
30 186 Switzerland). After that, we will start bag-mask pre-oxygenation until end-tidal O<sub>2</sub> has  
31  
32  
33 187 reached 90%. Patients will receive a fentanyl bolus of 2µg/kg, and induction of anaesthesia  
34  
35 188 will begin using a target-controlled infusion (TCI, Schnider model using syramed® µSP6000,  
36  
37 189 Arcomed AG, Regensdorf, Switzerland) for propofol with a target concentration of 3.0  
38  
39  
40 190 µg/ml and TCI for remifentanyl (Minto model using syramed® µSP6000, Arcomed AG,  
41  
42 191 Regensdorf, Switzerland) with a target concentration of 2.0 ng/ml. We will administer  
43  
44  
45 192 rocuronium 0.9mg/kg to achieve neuromuscular blockage. After induction, general  
46  
47  
48 193 anaesthesia will be confirmed by absent end-tidal CO<sub>2</sub> readings, unconsciousness and  
49  
50 194 Narcotrend®-values in the target range of 40 to 60 under bag-mask ventilation.  
51  
52 195 Once mask ventilation with a tidal volume of 6ml/kg and a respiratory rate of 12/min is  
53  
54  
55 196 successful, the previously sealed envelope containing the randomisation will be opened  
56  
57 197 and the intervention will be prepared according to group allocation.  
58  
59  
60

1  
2  
3 198 For safety reasons the experiment will be discontinued if mask ventilation is impossible  
4  
5  
6 199 even after full neuromuscular blockage and placement of an oropharyngeal tube. The  
7  
8 200 anaesthetist in charge would then intubate the trachea and no study-related  
9  
10 201 measurements would take place.

12  
13 202 For all patients who show a cardiovascular reaction (increase of heart rate and blood  
14  
15 203 pressure) to the study procedure (laryngoscopy or jaw thrust), we will titrate remifentanyl  
16  
17 204 to effect. Once steady state has set in, we will no longer interfere with remifentanyl.  
18  
19 205 Whenever Narcotrend® values rise above our target range, propofol will be increased. We  
20  
21 206 will not correct dropping Narcotrend® values as this is likely to be caused by increasing CO<sub>2</sub>  
22  
23 207 and therefore an effect we want to measure.

24  
25 208 When complete neuromuscular blockage has been confirmed by TOF = 0, we will stop mask  
26  
27 209 ventilation and start the apnoea time. Arterial blood gas will be drawn and analysed at start  
28  
29 210 of apnoea.

30  
31 211 If assigned to the control group, the study participant will receive high-flow humidified  
32  
33 212 oxygen at 70l/min via Optiflow™ (Fisher&Paykel, Auckland, NewZealand) throughout the  
34  
35 213 apnoea period while the glottis will be visualised by videolaryngoscopy (MacGrath™ MAC,  
36  
37 214 Medtronic, Dublin, Ireland), thus assuring airway patency. If assigned to one of the  
38  
39 215 intervention groups, one of the senior anaesthesia researchers will apply jaw thrust and  
40  
41 216 one of the following flow rates: 1) high-flow humidified oxygen at 70l/min via Optiflow™;  
42  
43 217 2) medium-flow humidified oxygen at 10l/min (Carbamed digiflow, Switzerland; Aquapak®  
44  
45 218 Hudson RCI®, Teleflex®, Wayne, Pennsylvania, USA; O2Star™ nasal cannula curved, Dräger,  
46  
47 219 Lübeck, Germany); or 3) low-flow humidified oxygen at 2l/min (Carbamed digiflow,  
48  
49 220 Switzerland; Aquapak® Hudson RCI®, Teleflex®, Wayne, Pennsylvania, USA; O2Star™ nasal  
50  
51 221 cannula curved, Dräger, Lübeck, Germany) (see Figure 1).

1  
2  
3 222 During jaw thrust, upper airway patency will be visually confirmed by a nasopharyngeal  
4  
5 223 fiberscope (EF-N slim, Acutronic, Hirzel, Switzerland).<sup>17</sup> Only if the airway is obstructed, we  
6  
7  
8 224 will insert an oropharyngeal airway tube (Guedel airway, Intersurgical<sup>®</sup>, Workingham,  
9  
10 225 Berkshire, UK). We will not assess the degree of opening, as this would not have any direct  
11  
12  
13 226 consequences for the study.

14  
15 227 During apnoea time, we will continuously measure invasive arterial blood pressure, pulse  
16  
17 228 oximetry and EKG as part of standard monitoring. Furthermore, we will continuously  
18  
19 229 measure tcpCO<sub>2</sub>, tcpO<sub>2</sub> by applying a probe to the patient's chest, two fingers below the  
20  
21 230 clavicle; depth of anaesthesia (Narcotrend<sup>®</sup>); bilateral brain oxygenation (NIRS); cardiac  
22  
23 231 output by pulse contour analysis; and ventilation distribution changes by thoracic electrical  
24  
25 232 impedance tomography. For this, resulting potential differences are measured, and  
26  
27 233 impedance distribution sampled at 30 Hz will be calculated by an automated linearized  
28  
29  
30 234 Newton-Raphson reconstruction algorithm<sup>18</sup>. Relative change in end-expiratory lung  
31  
32 235 impedance (EELI) and measures of ventilation inhomogeneity such as the global  
33  
34 236 inhomogeneity index (GI) will be calculated as described previously, using customised  
35  
36 237 software (Matlab R2013a, The MathWorks Inc., Nattick, MA, USA).<sup>19 20</sup>

37  
38 238 Furthermore, we will take arterial blood samples at the onset of apnoea, one minute after  
39  
40 239 apnoea, and thereafter every two minutes to perform blood gas analysis (total of max. 10  
41  
42 240 measurements). These blood samples will be analysed for PaO<sub>2</sub>, SaO<sub>2</sub>, PaCO<sub>2</sub>, pH,  
43  
44 241 bicarbonate and potassium.

45  
46 242 During the induction of anaesthesia, potential hypotension due to the anaesthetic drugs  
47  
48 243 will be counteracted with a continuous infusion of norepinephrine. Thereafter, steady  
49  
50 244 state will set in and any change in blood pressure is due to the vasoactive effect of CO<sub>2</sub>. As  
51  
52  
53  
54  
55  
56  
57  
58  
59  
60

1  
2  
3 245 we want to measure these effects we will no longer interfere with blood pressure, except  
4  
5  
6 246 for persisting hypotension.

7  
8 247 The experiment will end when any of the following criteria is met:  $SpO_2 < 92\%$ ,  $p_{tC}CO_2 > 10.67$   
9  
10 248 kPa,  $pH < 7.1$ ,  $K^+ > 6.0$  mmol/l,  $t = 15$  minutes. Thereafter the trachea will be intubated  
11  
12  
13 249 according to the decision of the attending anaesthetists. With that the pre-surgical part of  
14  
15 250 the study will end.

16  
17  
18 251 Study participants will either be visited on the ward or contacted by phone on the first  
19  
20 252 postoperative day in the morning to ask about the quality of recovery.<sup>21 22</sup> This includes  
21  
22  
23 253 ability to breathe easily, feeling rested, being able to enjoy food, getting support from  
24  
25 254 hospital doctors and nurses as well as any pain, nausea and vomiting, feeling worried or  
26  
27  
28 255 anxious, or feeling sad or depressed. Furthermore, we ask specifically for pain localised in  
29  
30 256 the patient's throat, mandibular joint, or head; nasal dryness; lip injuries; dental damages;  
31  
32  
33 257 other injuries; or any other discomfort or complication. For assessing the severity of  
34  
35 258 complications, we will use a (modified) visual analogue scale (VAS), where 0 is no pain (or  
36  
37  
38 259 discomfort), and 10 is maximum pain (or discomfort). We will also assess all injuries  
39  
40 260 obtained during airway management and the study period. After this interview, no further  
41  
42 261 data will be acquired, and the study ends.

## 43 44 45 262 **Objectives**

### 46 47 48 263 **Primary outcome**

49  
50  
51  
52 264 Our primary outcome is to measure the increase of mean transcutaneous  $CO_2$  over time in  
53  
54 265 kPa/min and to determine the influence of nasal oxygen flow rate (70l/min, 10l/min and  
55  
56  
57 266 2l/min) and the presence of an open mouth (jaw thrust vs. continuous laryngoscopy).

### 58 59 267 **Secondary outcomes**

60



1  
2  
3 268 Secondary outcomes are: lowest O<sub>2</sub> saturation; changes in end-expiratory lung impedance,  
4  
5  
6 269 which will help quantify the degree of atelectasis after intubation, and influence of  
7  
8 270 increasing CO<sub>2</sub> on: cardiac output and systemic blood pressure, invasive arterial blood  
9  
10 271 pressure, pulse oximetry and ECG as part of standard monitoring, tcpO<sub>2</sub>, depth of  
11  
12 272 anaesthesia, bilateral brain oxygenation (NIRS), arterial blood gas analysis (PaO<sub>2</sub>, SaO<sub>2</sub>,  
13  
14 273 PaCO<sub>2</sub>, pH, bicarbonate and potassium). Furthermore: postoperative pain, nausea and  
15  
16 274 vomiting, feeling worried or anxious, or feeling sad or depressed, injurie or any other  
17  
18 275 discomfort or complication.  
19  
20  
21  
22

### 23 276 **Statistical plan**

24  
25  
26 277 Distribution of data will be checked for normality using qq-plots and the Shapiro-Wilks  
27  
28 278 analysis using Stata (StataCorp LLC, College Station, Texas, USA). For our primary outcome  
29  
30 279 parameter, the rise of PtcCO<sub>2</sub>, we will use a linear mixed model using groups and minutes.  
31  
32  
33 280 Normal distributed data will be presented as means and standard deviation, otherwise  
34  
35 281 median and interquartile range will be used. Proportions will be presented as numbers and  
36  
37 282 percentage. Analytical statistics uses Mann-Whitney u-test and Student's t-test, according  
38  
39 283 distribution, or ANOVA and Kruskal-Wallis for multiple group comparisons. Each of the  
40  
41 284 groups will a-priory be compared to the control group independently, therefore no  
42  
43 285 correction for multiple comparisons will have to be used. Other multiple comparisons and  
44  
45 286 any subgroup-analyses will be performed using appropriate correction factors.  
46  
47 287 Proportions will be compared by Chi-square test or Fisher's exact test. As sensitivity  
48  
49 288 analyses, we will do regression analyses, using mixed effects linear regressions. All  
50  
51 289 statistical analyses will be performed on an intention-to-treat basis. We will also include a  
52  
53 290 per-protocol analysis in order to minimize bias for the standard treatment group. If the  
54  
55 291 results of such an analysis are consistent with those from the intention-to-treat approach  
56  
57  
58  
59  
60

1  
2  
3 292 and if both lie below the non-inferiority threshold, the inference regarding non-inferiority  
4  
5  
6 293 is strengthened. A  $p < 0.05$  will be considered as statistically significant.  
7  
8

9 294 **Patient involvement**

10  
11 295 No patients or patient representatives were involved in the design of this trial.  
12  
13  
14 296  
15  
16  
17  
18  
19  
20  
21  
22  
23  
24  
25  
26  
27  
28  
29  
30  
31  
32  
33  
34  
35  
36  
37  
38  
39  
40  
41  
42  
43  
44  
45  
46  
47  
48  
49  
50  
51  
52  
53  
54  
55  
56  
57  
58  
59  
60

For peer review only

## 297 ETHICS AND DISSEMINATION

298 This study will be conducted in accordance with the ICH GCP Note for Guidance on Good  
299 Clinical Practise and local regulations with approval of the Cantonal Ethics Committee Bern,  
300 following the Swiss law for human research.<sup>23</sup> The ethics committee already approved our  
301 study (ID 2018-00293), including the safety end points. A drop in O<sub>2</sub>-saturation < 92% allows  
302 for timely securing the airway without risk of hypoxic damages of the study participants.  
303 Furthermore, prior publications suggest it to be very likely that all groups maintain stable  
304 O<sub>2</sub>-saturation throughout the maximum apnoea time of 15 minutes.<sup>24 25</sup> Rising CO<sub>2</sub> levels  
305 could lead to acidosis; therefore, patients vulnerable to hypercarbia are excluded  
306 preliminarily (see section *study population*). As routinely stated in the protocol for the  
307 ethics committee, the study can be terminated prematurely if new evidence suggesting  
308 severe disadvantage or increased morbidity will arise during the study period.

309 All study data will be directly recorded in the CRF, which should also be considered being  
310 source data. These data will be transferred into the departmental research  
311 documentation system – LabKey (LabKey Software, Seattle, WA, USA, version 14.3). All  
312 study data will be archived for a minimum of 10 years after study termination or  
313 premature termination of the clinical trial.

314 Data will be transferred into a secure, web-based data integration platform and controlled  
315 independently by two members of the study team. Additionally, data are double-checked  
316 by comparing the screening records with the digital anaesthesia documenting system of  
317 the hospital.

318 A study nurse otherwise not involved in the study will be in charge of data monitoring and  
319 auditing after every 20 patients.

320 Important modifications to the protocol will have to reported to the ethics committee.

1  
2  
3 321 Both, the principal investigator and sponsor investigator will have access to the final trial  
4  
5  
6 322 data set. Other researchers may be granted access to the dataset to answer scientific  
7  
8 323 questions.

9  
10 324 Results will be presented at national and international scientific meetings and will be  
11  
12  
13 325 published in a peer-reviewed medical journal.

## 16 326 **Informed Consent**

17  
18  
19 327 In order to be eligible for the study, all patients have to sign an ethics committee approved  
20  
21 328 informed consent form. All potential risks and benefits will be thoroughly explained by  
22  
23  
24 329 study personnel and the patient will be given enough time to consider his or her study  
25  
26 330 participation.

27  
28  
29 331  
30  
31  
32  
33  
34  
35  
36  
37  
38  
39  
40  
41  
42  
43  
44  
45  
46  
47  
48  
49  
50  
51  
52  
53  
54  
55  
56  
57  
58  
59  
60

## DISCUSSION

Humidified high-flow nasal oxygenation is a widely used therapy in intensive care for both adults and paediatric spontaneously breathing patients. The new use in patients under general anaesthesia has revitalized the old concept of apnoeic oxygenation. Its use in anaesthesiology spreads from oxygenating an awake patient, to pre-oxygenation, as well as to apnoeic oxygenation during rapid-sequence intubation (RSI), or during micro laryngoscopy, and bronchoscopy. More and more applications for humidified HFNO or THRIVE are emerging and they show great potential.

However, there is only limited evidence explaining physiologic changes during HFNO, especially the proposed mechanism of CO<sub>2</sub> elimination by a ventilatory effect in anaesthetised patients. It remains unknown how different flow rates affect CO<sub>2</sub> clearance and if a minimal flow rate (of 2l/min) is able to maintain oxygenation over 15 minutes. There are a few studies suggesting lower flow rates could also be effective.<sup>24 25</sup> However, no prospective study compared high flow to low flow so far; and it has not yet been determined how flow rate influences CO<sub>2</sub> clearance. As high CO<sub>2</sub> levels have a multitude of effects, such as pulmonic arterial vasoconstriction, acidosis, and hyperkalaemia, a better understanding of CO<sub>2</sub> clearance could lead to the definition of contraindications or safety measurements for humidified HFNO/THRIVE, especially for longer apnoea periods (e.g. during micro laryngoscopy).

It is not known, if changes of thoracic electric impedance tomography in anaesthetised patients are similar to those in awake patients.<sup>26</sup> For example, it is already known that end-expiratory lung impedance (EELI) is increased in awake patients. This is probably due to a higher pharyngeal pressure observed in patients with HFNO who breath spontaneously. The effect has never been evaluated in anaesthetised patients.<sup>27 28</sup>

1  
2  
3 356 Also, haemodynamic changes during apnoeic oxygenation and under increasing PaCO<sub>2</sub>  
4  
5  
6 357 have not yet been investigated rigorously. We only found studies describing increased  
7  
8 358 PaCO<sub>2</sub> and its influence on cardiac output and brain perfusion in awake patients and  
9  
10 359 healthy volunteers<sup>9 10 29</sup>. It is very likely that anaesthetised patients have a different  
11  
12  
13 360 reaction due to the vasodilatory effect of most anaesthetic drugs, which could very easily  
14  
15 361 overweigh the vasoconstrictive effects of increased CO<sub>2</sub> levels.

16  
17  
18 362 Overall, knowledge of the underlying physiological mechanisms during HFNO in  
19  
20 363 anaesthetised patients is still very limited. This study investigates under rigorously  
21  
22  
23 364 controlled circumstances the concept of humidified HFNO on prolonged apnoea time,  
24  
25 365 presumably without desaturation. With our findings, we hope to improve airway  
26  
27  
28 366 management safety as this study enables the medical community to better understand the  
29  
30 367 physiology behind apnoeic oxygenation and the influence of different nasal flow rates on  
31  
32  
33 368 CO<sub>2</sub> clearance. Our study's extensive setup also allows us to measure the effects of  
34  
35 369 increased CO<sub>2</sub> on cerebral perfusion and cardiac output.

36  
37 370 If low-flow oxygen administration with standard nasal cannula is non-inferior compared to  
38  
39  
40 371 high-flow humidified HFNO, it could have direct clinical impact. Oxygen and standard nasal  
41  
42  
43 372 cannula are ubiquitously available and it will be hard to argue against apnoeic oxygenation  
44  
45 373 during routine intubation. Especially for rapid sequence intubation (RSI) and other  
46  
47 374 emergency airway procedures, apnoeic oxygenation may be – and perhaps should be –  
48  
49  
50 375 performed using a standard nasal cannula at a low flow rate.<sup>30</sup> For patients at risk of  
51  
52 376 desaturation, this has the potential to reduce complication of hypoxia and therefore will  
53  
54 377 improve patient safety with little additional resources.

55  
56  
57 378 Due to the design of this trial, we will not be able to determine the influence of  
58  
59 379 pathophysiologic alterations of patients' underlying diseases, as we exclude severely ill  
60

1  
2  
3 380 patients from this study for safety reasons. Furthermore, although we include 100 patients  
4  
5 381 in this trial, we may still end up with an uneven distribution of risk factors. To minimize this  
6  
7  
8 382 bias, we stratify according to BMI and smoking status, as we assume these factors to be  
9  
10 383 the most influential on our primary outcome.

11  
12  
13 384 Provided all groups have a similar CO<sub>2</sub> clearance, the inclusion of 100 patients will provide  
14  
15 385 a solid foundation to detect even smaller haemodynamic, thoracic EIT, or EEG changes.  
16  
17  
18 386 Nevertheless, all results are to be considered for anaesthetised patients using propofol and  
19  
20 387 remifentanyl. We do not know how other anaesthetic drugs would potentially interfere  
21  
22 388 with patients' physiology.

23  
24  
25 389 All this leads us to the conclusion that this study will be able to provide highly interesting  
26  
27 390 results and urgently needed evidence on physiologic changes during HFNO and CO<sub>2</sub>  
28  
29 391 increase in adult patients during apnoeic oxygenation. We will find an answer to our  
30  
31 392 question, if the application of nasal oxygen at 7l/min, 10l/min or 2l/min using jaw thrust is  
32  
33 393 non-inferior compared to nasal oxygen at 7l/min using continuous laryngoscopy in regard  
34  
35 394 to CO<sub>2</sub> clearance in anaesthetised patients.

36  
37  
38  
39  
40 395  
41  
42  
43  
44  
45  
46  
47  
48  
49  
50  
51  
52  
53  
54  
55  
56  
57  
58  
59  
60

## 396 **AUTHOR CONTRIBUTIONS**

397 RG and LT conceived the study. RG, LT, FS, HK, and TR wrote the study protocol. RG, LT, FS  
398 and HK developed the practical approach to measurement and recruitment. TRiv was  
399 involved in the protocol development and manuscript review. LT designed the statistical  
400 analysis plan for the protocol. All authors critically reviewed this manuscript and agree to  
401 its final form.

## 402 **FUNDING STATEMENT**

403 This research is funded by a departmental research grant assigned to LT. For this study,  
404 Fisher & Paykel (Auckland, New Zealand) provide all necessary breathing circuits and nasal  
405 cannulas without costs. Fisher & Paykel are neither involved in the design nor have they  
406 any influence on the data analysis and the presentation of results or their publication nor  
407 do the study authors have any financial or any other collaborations with Fisher & Paykel.

## 408 **COMPETING INTERESTS**

409 None of the authors have any financial or any other competing interests concerning this  
410 study.

## 411 **FIGURE LEGENDS**

412 Figure 1: Study flow chart



## 413 REFERENCES

- 414 1. Volhard F. Über künstliche Atmung durch Ventilation der Trachea und eine einfache  
415 Vorrichtung zur rhythmischen künstlichen Atmung. *Münchener Medizinische*  
416 *Wochenschrift* 1908;55(5)
- 417 2. Meltzer SJ, Auer J. Continuous Respiration without Respiratory Movements. *J Exp Med*  
418 1909;11(4):622-5.
- 419 3. Bartlett RG, Jr., Brubach HF, Specht H. Demonstration of a ventilatory mass flow during  
420 ventilation and apnea in man. *J Appl Physiol* 1959;14(1):97-101. doi:  
421 10.1152/jappl.1959.14.1.97
- 422 4. Eger EI, Severinghaus JW. The rate of rise of PaCO<sub>2</sub> in the apneic anesthetized patient.  
423 *Anesthesiology* 1961;22:419-25.
- 424 5. Patel A, Nouraei SA. Transnasal Humidified Rapid-Insufflation Ventilatory Exchange  
425 (THRIVE): a physiological method of increasing apnoea time in patients with  
426 difficult airways. *Anaesthesia* 2015;70(3):323-9. doi: 10.1111/anae.12923
- 427 6. Gustafsson IM, Lodenius A, Tunelli J, et al. Apnoeic oxygenation in adults under general  
428 anaesthesia using Transnasal Humidified Rapid-Insufflation Ventilatory Exchange  
429 (THRIVE) - a physiological study. *Br J Anaesth* 2017;118(4):610-17. doi:  
430 10.1093/bja/aex036
- 431 7. Lyons C, Callaghan M. Apnoeic oxygenation with high-flow nasal oxygen for laryngeal  
432 surgery: a case series. *Anaesthesia* 2017;72(11):1379-87. doi: 10.1111/anae.14036
- 433 8. Riva T, Seiler S, Stucki F, et al. High-flow nasal cannula therapy and apnea time in  
434 laryngeal surgery. *Paediatr Anaesth* 2016;26(12):1206-08. doi: 10.1111/pan.12992
- 435 9. Bain AR, Ainslie PN, Hoiland RL, et al. Cerebral oxidative metabolism is decreased with  
436 extreme apnoea in humans; impact of hypercapnia. *J Physiol* 2016;594(18):5317-28.  
437 doi: 10.1113/JP272404
- 438 10. Sechzer PH, Egbert LD, Linde HW, et al. Effect of carbon dioxide inhalation on arterial  
439 pressure, ECG and plasma catecholamines and 17-OH corticosteroids in normal  
440 man. *J Appl Physiol* 1960;15:454-8. doi: 10.1152/jappl.1960.15.3.454
- 441 11. Frumin MJ, Epstein RM, Cohen G. Apneic oxygenation in man. *Anesthesiology*  
442 1959;20:789-98.
- 443 12. Holmdahl MH. Pulmonary uptake of oxygen, acid-base metabolism, and circulation  
444 during prolonged apnoea. *Acta Chir Scand Suppl* 1956;212:1-128. [published Online  
445 First: 1956/01/01]
- 446 13. Stock MC, Schisler JQ, McSweeney TD. The PaCO<sub>2</sub> rate of rise in anesthetized patients  
447 with airway obstruction. *J Clin Anesth* 1989;1(5):328-32. [published Online First:  
448 1989/01/01]
- 449 14. Riva T, Pedersen TH, Seiler S, et al. Transnasal humidified rapid insufflation ventilatory  
450 exchange for oxygenation of children during apnoea: a prospective randomised  
451 controlled trial. *Br J Anaesth* 2018;120(3):592-99. doi: 10.1016/j.bja.2017.12.017  
452 [published Online First: 2018/02/18]
- 453 15. Humphreys S, Lee-Archer P, Reyne G, et al. Transnasal humidified rapid-insufflation  
454 ventilatory exchange (THRIVE) in children: a randomized controlled trial. *Br J*  
455 *Anaesth* 2017;118(2):232-38. doi: 10.1093/bja/aew401 [published Online First:  
456 2017/01/20]
- 457 16. M. Habben FA. Blutgasanalyse [Web Page]. 2018 [Available from:  
458 <http://flexikon.doccheck.com/de/Blutgasanalyse> accessed 19.1. 2018.

- 1  
2  
3 459 17. Uzun L, Ugur MB, Altunkaya H, et al. Effectiveness of the jaw-thrust maneuver in  
4 460 opening the airway: a flexible fiberoptic endoscopic study. *ORL J Otorhinolaryngol*  
5 461 *Relat Spec* 2005;67(1):39-44. doi: 10.1159/000084304  
6 462 18. Yorkey TJ, Webster JG, Tompkins WJ. Comparing reconstruction algorithms for  
7 463 electrical impedance tomography. *IEEE transactions on bio-medical engineering*  
8 464 1987;34(11):843-52.  
9 465 19. Schnidrig S, Casaulta C, Schibler A, et al. Influence of end-expiratory level and tidal  
10 466 volume on gravitational ventilation distribution during tidal breathing in healthy  
11 467 adults. *European journal of applied physiology* 2013;113(3):591-8.  
12 468 20. Wettstein M, Radlinger L, Riedel T. Effect of different breathing aids on ventilation  
13 469 distribution in adults with cystic fibrosis. *PloS one* 2014;9(9):e106591.  
14 470 21. Myles PS, Boney O, Botti M, et al. Systematic review and consensus definitions for the  
15 471 Standardised Endpoints in Perioperative Medicine (StEP) initiative: patient  
16 472 comfort. *British Journal of Anaesthesia* 2018;120(4):705-11. doi:  
17 473 10.1016/j.bja.2017.12.037  
18 474 22. Theiler L, Hermann K, Schoettker P, et al. SWIVIT--Swiss video-intubation trial  
19 475 evaluating video-laryngoscopes in a simulated difficult airway scenario: study  
20 476 protocol for a multicenter prospective randomized controlled trial in Switzerland.  
21 477 *Trials* 2013;14:94. doi: 10.1186/1745-6215-14-94 [published Online First: 2013/04/06]  
22 478 23. Bundesverfassung der Schweizerischen Eidgenossenschaft, Artikel 118b, 2010.  
23 479 24. Teller LE, Alexander CM, Frumin MJ, et al. Pharyngeal insufflation of oxygen prevents  
24 480 arterial desaturation during apnea. *Anesthesiology* 1988;69(6):980-2.  
25 481 25. Heard A, Toner AJ, Evans JR, et al. Apneic Oxygenation During Prolonged  
26 482 Laryngoscopy in Obese Patients: A Randomized, Controlled Trial of Buccal RAE  
27 483 Tube Oxygen Administration. *Anesth Analg* 2017;124(4):1162-67. doi:  
28 484 10.1213/ANE.0000000000001564  
29 485 26. Parke RL, Bloch A, McGuinness SP. Effect of Very-High-Flow Nasal Therapy on Airway  
30 486 Pressure and End-Expiratory Lung Impedance in Healthy Volunteers. *Respiratory*  
31 487 *Care* 2015;60(10):1397-403. doi: 10.4187/respcare.04028  
32 488 27. Groves N, Tobin A. High flow nasal oxygen generates positive airway pressure in adult  
33 489 volunteers. *Aust Crit Care* 2007;20(4):126-31. doi: 10.1016/j.aucc.2007.08.001  
34 490 28. Parke R, McGuinness S, Eccleston M. Nasal high-flow therapy delivers low level  
35 491 positive airway pressure. *Br J Anaesth* 2009;103(6):886-90. doi: 10.1093/bja/aep280  
36 492 29. Price HL. Effects of carbon dioxide on the cardiovascular system. *Anesthesiology*  
37 493 1960;21:652-63.  
38 494 30. Weingart SD, Levitan RM. Preoxygenation and prevention of desaturation during  
39 495 emergency airway management. *Ann Emerg Med* 2012;59(3):165-75 e1. doi:  
40 496 10.1016/j.annemergmed.2011.10.002 [published Online First: 2011/11/05]  
41 497  
42  
43  
44  
45  
46  
47  
48  
49  
50  
51  
52  
53  
54  
55  
56  
57  
58  
59  
60

1  
2  
3  
4  
5  
6  
7  
8  
9  
10  
11  
12  
13  
14  
15  
16  
17  
18  
19  
20  
21  
22  
23  
24  
25  
26  
27  
28  
29  
30  
31  
32  
33  
34  
35  
36  
37  
38  
39  
40  
41  
42  
43  
44  
45  
46  
47  
48  
49  
50  
51  
52  
53  
54  
55  
56  
57  
58  
59  
60

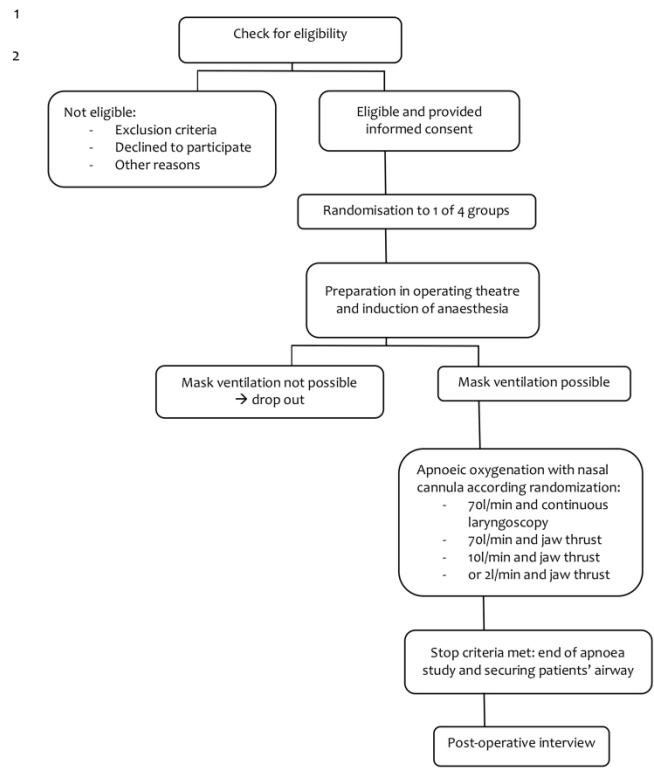

1

Figure 1

296x419mm (300 x 300 DPI)

# Reporting checklist for protocol of a clinical trial.

Based on the SPIRIT guidelines.

|                                                         |     | Reporting Item                                                                                                                                                                                                                                                                                                                     | Page Number |
|---------------------------------------------------------|-----|------------------------------------------------------------------------------------------------------------------------------------------------------------------------------------------------------------------------------------------------------------------------------------------------------------------------------------|-------------|
| Title                                                   | #1  | Descriptive title identifying the study design, population, interventions, and, if applicable, trial acronym                                                                                                                                                                                                                       | 1           |
| Trial registration                                      | #2a | Trial identifier and registry name. If not yet registered, name of intended registry                                                                                                                                                                                                                                               | 4           |
| Trial registration: data set                            | #2b | All items from the World Health Organization Trial Registration Data Set<br><i>Explanation: different registry used</i>                                                                                                                                                                                                            | n/a         |
| Protocol version                                        | #3  | Date and version identifier<br>V4.5, February 2019                                                                                                                                                                                                                                                                                 |             |
| Funding                                                 | #4  | Sources and types of financial, material, and other support                                                                                                                                                                                                                                                                        | 22          |
| Roles and responsibilities: contributorship             | #5a | Names, affiliations, and roles of protocol contributors                                                                                                                                                                                                                                                                            | 1           |
| Roles and responsibilities: sponsor contact information | #5b | Name and contact information for the trial sponsor                                                                                                                                                                                                                                                                                 | 1           |
| Roles and responsibilities: sponsor and funder          | #5c | Role of study sponsor and funders, if any, in study design; collection, management, analysis, and interpretation of data; writing of the report; and the decision to submit the report for publication, including whether they will have ultimate authority over any of these activities<br><i>Note: investigator-driven study</i> | 22          |
| Roles and responsibilities: committees                  | #5d | Composition, roles, and responsibilities of the coordinating centre, steering committee, endpoint adjudication committee, data                                                                                                                                                                                                     | n/a         |

management team, and other individuals or groups overseeing the trial, if applicable (see Item 21a for data monitoring committee)

*Explanation: Single-center study*

|    |                      |      |                                                                        |       |
|----|----------------------|------|------------------------------------------------------------------------|-------|
| 1  |                      |      |                                                                        |       |
| 2  |                      |      |                                                                        |       |
| 3  |                      |      |                                                                        |       |
| 4  |                      |      |                                                                        |       |
| 5  |                      |      |                                                                        |       |
| 6  | Background and       | #6a  | Description of research question and justification for undertaking     | 6     |
| 7  | rationale            |      | the trial, including summary of relevant studies (published and        |       |
| 8  |                      |      | unpublished) examining benefits and harms for each intervention        |       |
| 9  |                      |      |                                                                        |       |
| 10 |                      |      |                                                                        |       |
| 11 | Background and       | #6b  | Explanation for choice of comparators                                  | 7     |
| 12 | rationale: choice of |      |                                                                        |       |
| 13 | comparators          |      |                                                                        |       |
| 14 |                      |      |                                                                        |       |
| 15 |                      |      |                                                                        |       |
| 16 |                      |      |                                                                        |       |
| 17 | Objectives           | #7   | Specific objectives or hypotheses                                      | 6, 7  |
| 18 |                      |      |                                                                        |       |
| 19 | Trial design         | #8   | Description of trial design including type of trial (eg, parallel      | 8     |
| 20 |                      |      | group, crossover, factorial, single group), allocation ratio, and      |       |
| 21 |                      |      | framework (eg, superiority, equivalence, non-inferiority,              |       |
| 22 |                      |      | exploratory)                                                           |       |
| 23 |                      |      |                                                                        |       |
| 24 |                      |      |                                                                        |       |
| 25 |                      |      |                                                                        |       |
| 26 | Study setting        | #9   | Description of study settings (eg, community clinic, academic          | 8     |
| 27 |                      |      | hospital) and list of countries where data will be collected.          |       |
| 28 |                      |      | Reference to where list of study sites can be obtained                 |       |
| 29 |                      |      |                                                                        |       |
| 30 |                      |      |                                                                        |       |
| 31 | Eligibility criteria | #10  | Inclusion and exclusion criteria for participants. If applicable,      | 8-10  |
| 32 |                      |      | eligibility criteria for study centres and individuals who will        |       |
| 33 |                      |      | perform the interventions (eg, surgeons, psychotherapists)             |       |
| 34 |                      |      |                                                                        |       |
| 35 |                      |      |                                                                        |       |
| 36 |                      |      |                                                                        |       |
| 37 | Interventions:       | #11a | Interventions for each group with sufficient detail to allow           | 11-14 |
| 38 | description          |      | replication, including how and when they will be administered          |       |
| 39 |                      |      |                                                                        |       |
| 40 |                      |      |                                                                        |       |
| 41 | Interventions:       | #11b | Criteria for discontinuing or modifying allocated interventions for    | 14    |
| 42 | modifications        |      | a given trial participant (eg, drug dose change in response to         |       |
| 43 |                      |      | harms, participant request, or improving / worsening disease)          |       |
| 44 |                      |      |                                                                        |       |
| 45 |                      |      |                                                                        |       |
| 46 | Interventions:       | #11c | Strategies to improve adherence to intervention protocols, and any     | n/a   |
| 47 | adherence            |      | procedures for monitoring adherence (eg, drug tablet return;           |       |
| 48 |                      |      | laboratory tests)                                                      |       |
| 49 |                      |      |                                                                        |       |
| 50 |                      |      |                                                                        |       |
| 51 |                      |      |                                                                        |       |
| 52 |                      |      | <i>Explanation: no compliance of patient necessary. Short duration</i> |       |
| 53 |                      |      | <i>of intervention (15 min)</i>                                        |       |
| 54 |                      |      |                                                                        |       |
| 55 | Interventions:       | #11d | Relevant concomitant care and interventions that are permitted or      | n/a   |
| 56 | concomitant care     |      | prohibited during the trial                                            |       |
| 57 |                      |      |                                                                        |       |
| 58 |                      |      |                                                                        |       |
| 59 |                      |      |                                                                        |       |
| 60 |                      |      |                                                                        |       |

*Explanation: short duration of trial (15 min), no additional interventions necessary*

|    |                                          |      |                                                                                                                                                                                                                                                                                                                                                                                |
|----|------------------------------------------|------|--------------------------------------------------------------------------------------------------------------------------------------------------------------------------------------------------------------------------------------------------------------------------------------------------------------------------------------------------------------------------------|
| 1  |                                          |      |                                                                                                                                                                                                                                                                                                                                                                                |
| 2  |                                          |      |                                                                                                                                                                                                                                                                                                                                                                                |
| 3  |                                          |      |                                                                                                                                                                                                                                                                                                                                                                                |
| 4  |                                          |      |                                                                                                                                                                                                                                                                                                                                                                                |
| 5  | Outcomes                                 | #12  | Primary, secondary, and other outcomes, including the specific measurement variable (eg, systolic blood pressure), analysis metric (eg, change from baseline, final value, time to event), method of aggregation (eg, median, proportion), and time point for each outcome. Explanation of the clinical relevance of chosen efficacy and harm outcomes is strongly recommended |
| 6  |                                          |      | 15                                                                                                                                                                                                                                                                                                                                                                             |
| 7  |                                          |      |                                                                                                                                                                                                                                                                                                                                                                                |
| 8  |                                          |      |                                                                                                                                                                                                                                                                                                                                                                                |
| 9  |                                          |      |                                                                                                                                                                                                                                                                                                                                                                                |
| 10 |                                          |      |                                                                                                                                                                                                                                                                                                                                                                                |
| 11 |                                          |      |                                                                                                                                                                                                                                                                                                                                                                                |
| 12 |                                          |      |                                                                                                                                                                                                                                                                                                                                                                                |
| 13 |                                          |      |                                                                                                                                                                                                                                                                                                                                                                                |
| 14 | Participant timeline                     | #13  | Time schedule of enrolment, interventions (including any run-ins and washouts), assessments, and visits for participants. A schematic diagram is highly recommended (see Figure)                                                                                                                                                                                               |
| 15 |                                          |      | Figure 1                                                                                                                                                                                                                                                                                                                                                                       |
| 16 |                                          |      |                                                                                                                                                                                                                                                                                                                                                                                |
| 17 |                                          |      |                                                                                                                                                                                                                                                                                                                                                                                |
| 18 |                                          |      |                                                                                                                                                                                                                                                                                                                                                                                |
| 19 |                                          |      |                                                                                                                                                                                                                                                                                                                                                                                |
| 20 | Sample size                              | #14  | Estimated number of participants needed to achieve study objectives and how it was determined, including clinical and statistical assumptions supporting any sample size calculations                                                                                                                                                                                          |
| 21 |                                          |      | 10                                                                                                                                                                                                                                                                                                                                                                             |
| 22 |                                          |      |                                                                                                                                                                                                                                                                                                                                                                                |
| 23 |                                          |      |                                                                                                                                                                                                                                                                                                                                                                                |
| 24 |                                          |      |                                                                                                                                                                                                                                                                                                                                                                                |
| 25 | Recruitment                              | #15  | Strategies for achieving adequate participant enrolment to reach target sample size                                                                                                                                                                                                                                                                                            |
| 26 |                                          |      | 8, 9                                                                                                                                                                                                                                                                                                                                                                           |
| 27 |                                          |      |                                                                                                                                                                                                                                                                                                                                                                                |
| 28 |                                          |      |                                                                                                                                                                                                                                                                                                                                                                                |
| 29 | Allocation: sequence generation          | #16a | Method of generating the allocation sequence (eg, computer-generated random numbers), and list of any factors for stratification. To reduce predictability of a random sequence, details of any planned restriction (eg, blocking) should be provided in a separate document that is unavailable to those who enrol participants or assign interventions                       |
| 30 |                                          |      | 10                                                                                                                                                                                                                                                                                                                                                                             |
| 31 |                                          |      |                                                                                                                                                                                                                                                                                                                                                                                |
| 32 |                                          |      |                                                                                                                                                                                                                                                                                                                                                                                |
| 33 |                                          |      |                                                                                                                                                                                                                                                                                                                                                                                |
| 34 |                                          |      |                                                                                                                                                                                                                                                                                                                                                                                |
| 35 |                                          |      |                                                                                                                                                                                                                                                                                                                                                                                |
| 36 |                                          |      |                                                                                                                                                                                                                                                                                                                                                                                |
| 37 |                                          |      |                                                                                                                                                                                                                                                                                                                                                                                |
| 38 |                                          |      |                                                                                                                                                                                                                                                                                                                                                                                |
| 39 | Allocation concealment mechanism         | #16b | Mechanism of implementing the allocation sequence (eg, central telephone; sequentially numbered, opaque, sealed envelopes), describing any steps to conceal the sequence until interventions are assigned                                                                                                                                                                      |
| 40 |                                          |      | 10                                                                                                                                                                                                                                                                                                                                                                             |
| 41 |                                          |      |                                                                                                                                                                                                                                                                                                                                                                                |
| 42 |                                          |      |                                                                                                                                                                                                                                                                                                                                                                                |
| 43 |                                          |      |                                                                                                                                                                                                                                                                                                                                                                                |
| 44 |                                          |      |                                                                                                                                                                                                                                                                                                                                                                                |
| 45 |                                          |      |                                                                                                                                                                                                                                                                                                                                                                                |
| 46 | Allocation: implementation               | #16c | Who will generate the allocation sequence, who will enrol participants, and who will assign participants to interventions                                                                                                                                                                                                                                                      |
| 47 |                                          |      | 10                                                                                                                                                                                                                                                                                                                                                                             |
| 48 |                                          |      |                                                                                                                                                                                                                                                                                                                                                                                |
| 49 | Blinding (masking)                       | #17a | Who will be blinded after assignment to interventions (eg, trial participants, care providers, outcome assessors, data analysts), and how                                                                                                                                                                                                                                      |
| 50 |                                          |      | 8                                                                                                                                                                                                                                                                                                                                                                              |
| 51 |                                          |      |                                                                                                                                                                                                                                                                                                                                                                                |
| 52 |                                          |      |                                                                                                                                                                                                                                                                                                                                                                                |
| 53 |                                          |      |                                                                                                                                                                                                                                                                                                                                                                                |
| 54 |                                          |      |                                                                                                                                                                                                                                                                                                                                                                                |
| 55 | Blinding (masking): emergency unblinding | #17b | If blinded, circumstances under which unblinding is permissible, and procedure for revealing a participant's allocated intervention during the trial                                                                                                                                                                                                                           |
| 56 |                                          |      | n/a                                                                                                                                                                                                                                                                                                                                                                            |
| 57 |                                          |      |                                                                                                                                                                                                                                                                                                                                                                                |
| 58 |                                          |      |                                                                                                                                                                                                                                                                                                                                                                                |
| 59 |                                          |      |                                                                                                                                                                                                                                                                                                                                                                                |
| 60 |                                          |      |                                                                                                                                                                                                                                                                                                                                                                                |

*Explanation: blinding not possible*

|    |                                                  |      |                                                                                                                                                                                                                                                                                                                                                                                                              |        |
|----|--------------------------------------------------|------|--------------------------------------------------------------------------------------------------------------------------------------------------------------------------------------------------------------------------------------------------------------------------------------------------------------------------------------------------------------------------------------------------------------|--------|
| 1  |                                                  |      |                                                                                                                                                                                                                                                                                                                                                                                                              |        |
| 2  |                                                  |      |                                                                                                                                                                                                                                                                                                                                                                                                              |        |
| 3  | Data collection plan                             | #18a | Plans for assessment and collection of outcome, baseline, and other trial data, including any related processes to promote data quality (eg, duplicate measurements, training of assessors) and a description of study instruments (eg, questionnaires, laboratory tests) along with their reliability and validity, if known. Reference to where data collection forms can be found, if not in the protocol | 11-14  |
| 4  |                                                  |      |                                                                                                                                                                                                                                                                                                                                                                                                              |        |
| 5  |                                                  |      |                                                                                                                                                                                                                                                                                                                                                                                                              |        |
| 6  |                                                  |      |                                                                                                                                                                                                                                                                                                                                                                                                              |        |
| 7  |                                                  |      |                                                                                                                                                                                                                                                                                                                                                                                                              |        |
| 8  |                                                  |      |                                                                                                                                                                                                                                                                                                                                                                                                              |        |
| 9  |                                                  |      |                                                                                                                                                                                                                                                                                                                                                                                                              |        |
| 10 |                                                  |      |                                                                                                                                                                                                                                                                                                                                                                                                              |        |
| 11 |                                                  |      |                                                                                                                                                                                                                                                                                                                                                                                                              |        |
| 12 |                                                  |      |                                                                                                                                                                                                                                                                                                                                                                                                              |        |
| 13 | Data collection plan: retention                  | #18b | Plans to promote participant retention and complete follow-up, including list of any outcome data to be collected for participants who discontinue or deviate from intervention protocols                                                                                                                                                                                                                    | 11-14  |
| 14 |                                                  |      |                                                                                                                                                                                                                                                                                                                                                                                                              |        |
| 15 |                                                  |      |                                                                                                                                                                                                                                                                                                                                                                                                              |        |
| 16 |                                                  |      |                                                                                                                                                                                                                                                                                                                                                                                                              |        |
| 17 |                                                  |      |                                                                                                                                                                                                                                                                                                                                                                                                              |        |
| 18 | Data management                                  | #19  | Plans for data entry, coding, security, and storage, including any related processes to promote data quality (eg, double data entry; range checks for data values). Reference to where details of data management procedures can be found, if not in the protocol                                                                                                                                            | 17-18  |
| 19 |                                                  |      |                                                                                                                                                                                                                                                                                                                                                                                                              |        |
| 20 |                                                  |      |                                                                                                                                                                                                                                                                                                                                                                                                              |        |
| 21 |                                                  |      |                                                                                                                                                                                                                                                                                                                                                                                                              |        |
| 22 |                                                  |      |                                                                                                                                                                                                                                                                                                                                                                                                              |        |
| 23 |                                                  |      |                                                                                                                                                                                                                                                                                                                                                                                                              |        |
| 24 |                                                  |      |                                                                                                                                                                                                                                                                                                                                                                                                              |        |
| 25 | Statistics: outcomes                             | #20a | Statistical methods for analysing primary and secondary outcomes. Reference to where other details of the statistical analysis plan can be found, if not in the protocol                                                                                                                                                                                                                                     | 15, 16 |
| 26 |                                                  |      |                                                                                                                                                                                                                                                                                                                                                                                                              |        |
| 27 |                                                  |      |                                                                                                                                                                                                                                                                                                                                                                                                              |        |
| 28 |                                                  |      |                                                                                                                                                                                                                                                                                                                                                                                                              |        |
| 29 |                                                  |      |                                                                                                                                                                                                                                                                                                                                                                                                              |        |
| 30 | Statistics: additional analyses                  | #20b | Methods for any additional analyses (eg, subgroup and adjusted analyses)                                                                                                                                                                                                                                                                                                                                     | 15, 16 |
| 31 |                                                  |      |                                                                                                                                                                                                                                                                                                                                                                                                              |        |
| 32 |                                                  |      |                                                                                                                                                                                                                                                                                                                                                                                                              |        |
| 33 |                                                  |      |                                                                                                                                                                                                                                                                                                                                                                                                              |        |
| 34 | Statistics: analysis population and missing data | #20c | Definition of analysis population relating to protocol non-adherence (eg, as randomised analysis), and any statistical methods to handle missing data (eg, multiple imputation)                                                                                                                                                                                                                              | 15, 16 |
| 35 |                                                  |      |                                                                                                                                                                                                                                                                                                                                                                                                              |        |
| 36 |                                                  |      |                                                                                                                                                                                                                                                                                                                                                                                                              |        |
| 37 |                                                  |      |                                                                                                                                                                                                                                                                                                                                                                                                              |        |
| 38 |                                                  |      |                                                                                                                                                                                                                                                                                                                                                                                                              |        |
| 39 | Data monitoring: formal committee                | #21a | Composition of data monitoring committee (DMC); summary of its role and reporting structure; statement of whether it is independent from the sponsor and competing interests; and reference to where further details about its charter can be found, if not in the protocol. Alternatively, an explanation of why a DMC is not needed                                                                        | 17     |
| 40 |                                                  |      |                                                                                                                                                                                                                                                                                                                                                                                                              |        |
| 41 |                                                  |      |                                                                                                                                                                                                                                                                                                                                                                                                              |        |
| 42 |                                                  |      |                                                                                                                                                                                                                                                                                                                                                                                                              |        |
| 43 |                                                  |      |                                                                                                                                                                                                                                                                                                                                                                                                              |        |
| 44 |                                                  |      |                                                                                                                                                                                                                                                                                                                                                                                                              |        |
| 45 |                                                  |      |                                                                                                                                                                                                                                                                                                                                                                                                              |        |
| 46 |                                                  |      |                                                                                                                                                                                                                                                                                                                                                                                                              |        |
| 47 |                                                  |      |                                                                                                                                                                                                                                                                                                                                                                                                              |        |
| 48 |                                                  |      |                                                                                                                                                                                                                                                                                                                                                                                                              |        |
| 49 | Data monitoring: interim analysis                | #21b | Description of any interim analyses and stopping guidelines, including who will have access to these interim results and make the final decision to terminate the trial                                                                                                                                                                                                                                      | 17, 18 |
| 50 |                                                  |      |                                                                                                                                                                                                                                                                                                                                                                                                              |        |
| 51 |                                                  |      |                                                                                                                                                                                                                                                                                                                                                                                                              |        |
| 52 |                                                  |      |                                                                                                                                                                                                                                                                                                                                                                                                              |        |
| 53 |                                                  |      |                                                                                                                                                                                                                                                                                                                                                                                                              |        |
| 54 |                                                  |      |                                                                                                                                                                                                                                                                                                                                                                                                              |        |
| 55 | Harms                                            | #22  | Plans for collecting, assessing, reporting, and managing solicited and spontaneously reported adverse events and other unintended effects of trial interventions or trial conduct                                                                                                                                                                                                                            | 17, 18 |
| 56 |                                                  |      |                                                                                                                                                                                                                                                                                                                                                                                                              |        |
| 57 |                                                  |      |                                                                                                                                                                                                                                                                                                                                                                                                              |        |
| 58 |                                                  |      |                                                                                                                                                                                                                                                                                                                                                                                                              |        |
| 59 |                                                  |      |                                                                                                                                                                                                                                                                                                                                                                                                              |        |
| 60 |                                                  |      |                                                                                                                                                                                                                                                                                                                                                                                                              |        |

|    |                                      |      |                                                                                                                                                                                                                                                                                     |        |
|----|--------------------------------------|------|-------------------------------------------------------------------------------------------------------------------------------------------------------------------------------------------------------------------------------------------------------------------------------------|--------|
| 1  | Auditing                             | #23  | Frequency and procedures for auditing trial conduct, if any, and whether the process will be independent from investigators and the sponsor                                                                                                                                         | 17, 18 |
| 2  |                                      |      |                                                                                                                                                                                                                                                                                     |        |
| 3  |                                      |      |                                                                                                                                                                                                                                                                                     |        |
| 4  |                                      |      |                                                                                                                                                                                                                                                                                     |        |
| 5  |                                      |      |                                                                                                                                                                                                                                                                                     |        |
| 6  | Research ethics approval             | #24  | Plans for seeking research ethics committee / institutional review board (REC / IRB) approval                                                                                                                                                                                       | 17     |
| 7  |                                      |      |                                                                                                                                                                                                                                                                                     |        |
| 8  |                                      |      |                                                                                                                                                                                                                                                                                     |        |
| 9  |                                      |      |                                                                                                                                                                                                                                                                                     |        |
| 10 | Protocol amendments                  | #25  | Plans for communicating important protocol modifications (eg, changes to eligibility criteria, outcomes, analyses) to relevant parties (eg, investigators, REC / IRBs, trial participants, trial registries, journals, regulators)                                                  | 17, 18 |
| 11 |                                      |      |                                                                                                                                                                                                                                                                                     |        |
| 12 |                                      |      |                                                                                                                                                                                                                                                                                     |        |
| 13 |                                      |      |                                                                                                                                                                                                                                                                                     |        |
| 14 |                                      |      |                                                                                                                                                                                                                                                                                     |        |
| 15 |                                      |      |                                                                                                                                                                                                                                                                                     |        |
| 16 |                                      |      |                                                                                                                                                                                                                                                                                     |        |
| 17 | Consent or assent                    | #26a | Who will obtain informed consent or assent from potential trial participants or authorised surrogates, and how (see Item 32)                                                                                                                                                        | 18     |
| 18 |                                      |      |                                                                                                                                                                                                                                                                                     |        |
| 19 |                                      |      |                                                                                                                                                                                                                                                                                     |        |
| 20 |                                      |      |                                                                                                                                                                                                                                                                                     |        |
| 21 | Consent or assent: ancillary studies | #26b | Additional consent provisions for collection and use of participant data and biological specimens in ancillary studies, if applicable                                                                                                                                               | n/a    |
| 22 |                                      |      |                                                                                                                                                                                                                                                                                     |        |
| 23 |                                      |      |                                                                                                                                                                                                                                                                                     |        |
| 24 | Confidentiality                      | #27  | How personal information about potential and enrolled participants will be collected, shared, and maintained in order to protect confidentiality before, during, and after the trial                                                                                                | n/a    |
| 25 |                                      |      |                                                                                                                                                                                                                                                                                     |        |
| 26 |                                      |      |                                                                                                                                                                                                                                                                                     |        |
| 27 |                                      |      |                                                                                                                                                                                                                                                                                     |        |
| 28 |                                      |      |                                                                                                                                                                                                                                                                                     |        |
| 29 |                                      |      |                                                                                                                                                                                                                                                                                     |        |
| 30 | Declaration of interests             | #28  | Financial and other competing interests for principal investigators for the overall trial and each study site                                                                                                                                                                       | 22     |
| 31 |                                      |      |                                                                                                                                                                                                                                                                                     |        |
| 32 |                                      |      |                                                                                                                                                                                                                                                                                     |        |
| 33 |                                      |      |                                                                                                                                                                                                                                                                                     |        |
| 34 | Data access                          | #29  | Statement of who will have access to the final trial dataset, and disclosure of contractual agreements that limit such access for investigators                                                                                                                                     | 17, 18 |
| 35 |                                      |      |                                                                                                                                                                                                                                                                                     |        |
| 36 |                                      |      |                                                                                                                                                                                                                                                                                     |        |
| 37 |                                      |      |                                                                                                                                                                                                                                                                                     |        |
| 38 |                                      |      |                                                                                                                                                                                                                                                                                     |        |
| 39 | Ancillary and post trial care        | #30  | Provisions, if any, for ancillary and post-trial care, and for compensation to those who suffer harm from trial participation                                                                                                                                                       | n/a    |
| 40 |                                      |      |                                                                                                                                                                                                                                                                                     |        |
| 41 |                                      |      |                                                                                                                                                                                                                                                                                     |        |
| 42 |                                      |      |                                                                                                                                                                                                                                                                                     |        |
| 43 |                                      |      | <i>Explanation: no provisions</i>                                                                                                                                                                                                                                                   |        |
| 44 |                                      |      |                                                                                                                                                                                                                                                                                     |        |
| 45 | Dissemination policy: trial results  | #31a | Plans for investigators and sponsor to communicate trial results to participants, healthcare professionals, the public, and other relevant groups (eg, via publication, reporting in results databases, or other data sharing arrangements), including any publication restrictions | 18     |
| 46 |                                      |      |                                                                                                                                                                                                                                                                                     |        |
| 47 |                                      |      |                                                                                                                                                                                                                                                                                     |        |
| 48 |                                      |      |                                                                                                                                                                                                                                                                                     |        |
| 49 |                                      |      |                                                                                                                                                                                                                                                                                     |        |
| 50 |                                      |      |                                                                                                                                                                                                                                                                                     |        |
| 51 |                                      |      |                                                                                                                                                                                                                                                                                     |        |
| 52 |                                      |      |                                                                                                                                                                                                                                                                                     |        |
| 53 | Dissemination policy: authorship     | #31b | Authorship eligibility guidelines and any intended use of professional writers                                                                                                                                                                                                      | n/a    |
| 54 |                                      |      |                                                                                                                                                                                                                                                                                     |        |
| 55 |                                      |      |                                                                                                                                                                                                                                                                                     |        |
| 56 |                                      |      |                                                                                                                                                                                                                                                                                     |        |
| 57 |                                      |      | <i>Explanation: no professional writers</i>                                                                                                                                                                                                                                         |        |
| 58 |                                      |      |                                                                                                                                                                                                                                                                                     |        |
| 59 |                                      |      |                                                                                                                                                                                                                                                                                     |        |
| 60 |                                      |      |                                                                                                                                                                                                                                                                                     |        |



|    |                       |      |                                                                      |     |
|----|-----------------------|------|----------------------------------------------------------------------|-----|
| 1  | Dissemination policy: | #31c | Plans, if any, for granting public access to the full protocol,      | n/a |
| 2  | reproducible research |      | participant-level dataset, and statistical code                      |     |
| 3  |                       |      |                                                                      |     |
| 4  |                       |      |                                                                      |     |
| 5  |                       |      | <i>Explanation: none</i>                                             |     |
| 6  |                       |      |                                                                      |     |
| 7  | Informed consent      | #32  | Model consent form and other related documentation given to          | n/a |
| 8  | materials             |      | participants and authorised surrogates                               |     |
| 9  |                       |      |                                                                      |     |
| 10 |                       |      |                                                                      |     |
| 11 |                       |      | <i>Explanation: only available in German. May be obtained upon</i>   |     |
| 12 |                       |      | <i>request by the author</i>                                         |     |
| 13 |                       |      |                                                                      |     |
| 14 |                       |      |                                                                      |     |
| 15 | Biological specimens  | #33  | Plans for collection, laboratory evaluation, and storage of          | n/a |
| 16 |                       |      | biological specimens for genetic or molecular analysis in the        |     |
| 17 |                       |      | current trial and for future use in ancillary studies, if applicable |     |
| 18 |                       |      |                                                                      |     |
| 19 |                       |      |                                                                      |     |
| 20 |                       |      | <i>Explanation: not applicable</i>                                   |     |
| 21 |                       |      |                                                                      |     |

22 The SPIRIT checklist is distributed under the terms of the Creative Commons Attribution License CC-BY-ND  
23 3.0. This checklist was completed on 30. May 2018 using <http://www.goodreports.org/>, a tool made by the  
24 [EQUATOR Network](#) in collaboration with [Penelope.ai](#)  
25  
26  
27  
28  
29  
30  
31  
32  
33  
34  
35  
36  
37  
38  
39  
40  
41  
42  
43  
44  
45  
46  
47  
48  
49  
50  
51  
52  
53  
54  
55  
56  
57  
58  
59  
60
